# Supplementary material for: RNA-seq analysis of differential gene expression in liver from lactating dairy cows divergent in negative energy balance
Source: PubMed Central journal article supplement (PMC3465249; doi:10.1186/1471-2164-13-193), 2012-05-20

STEROID HORMONE BIOSYNTHESIS

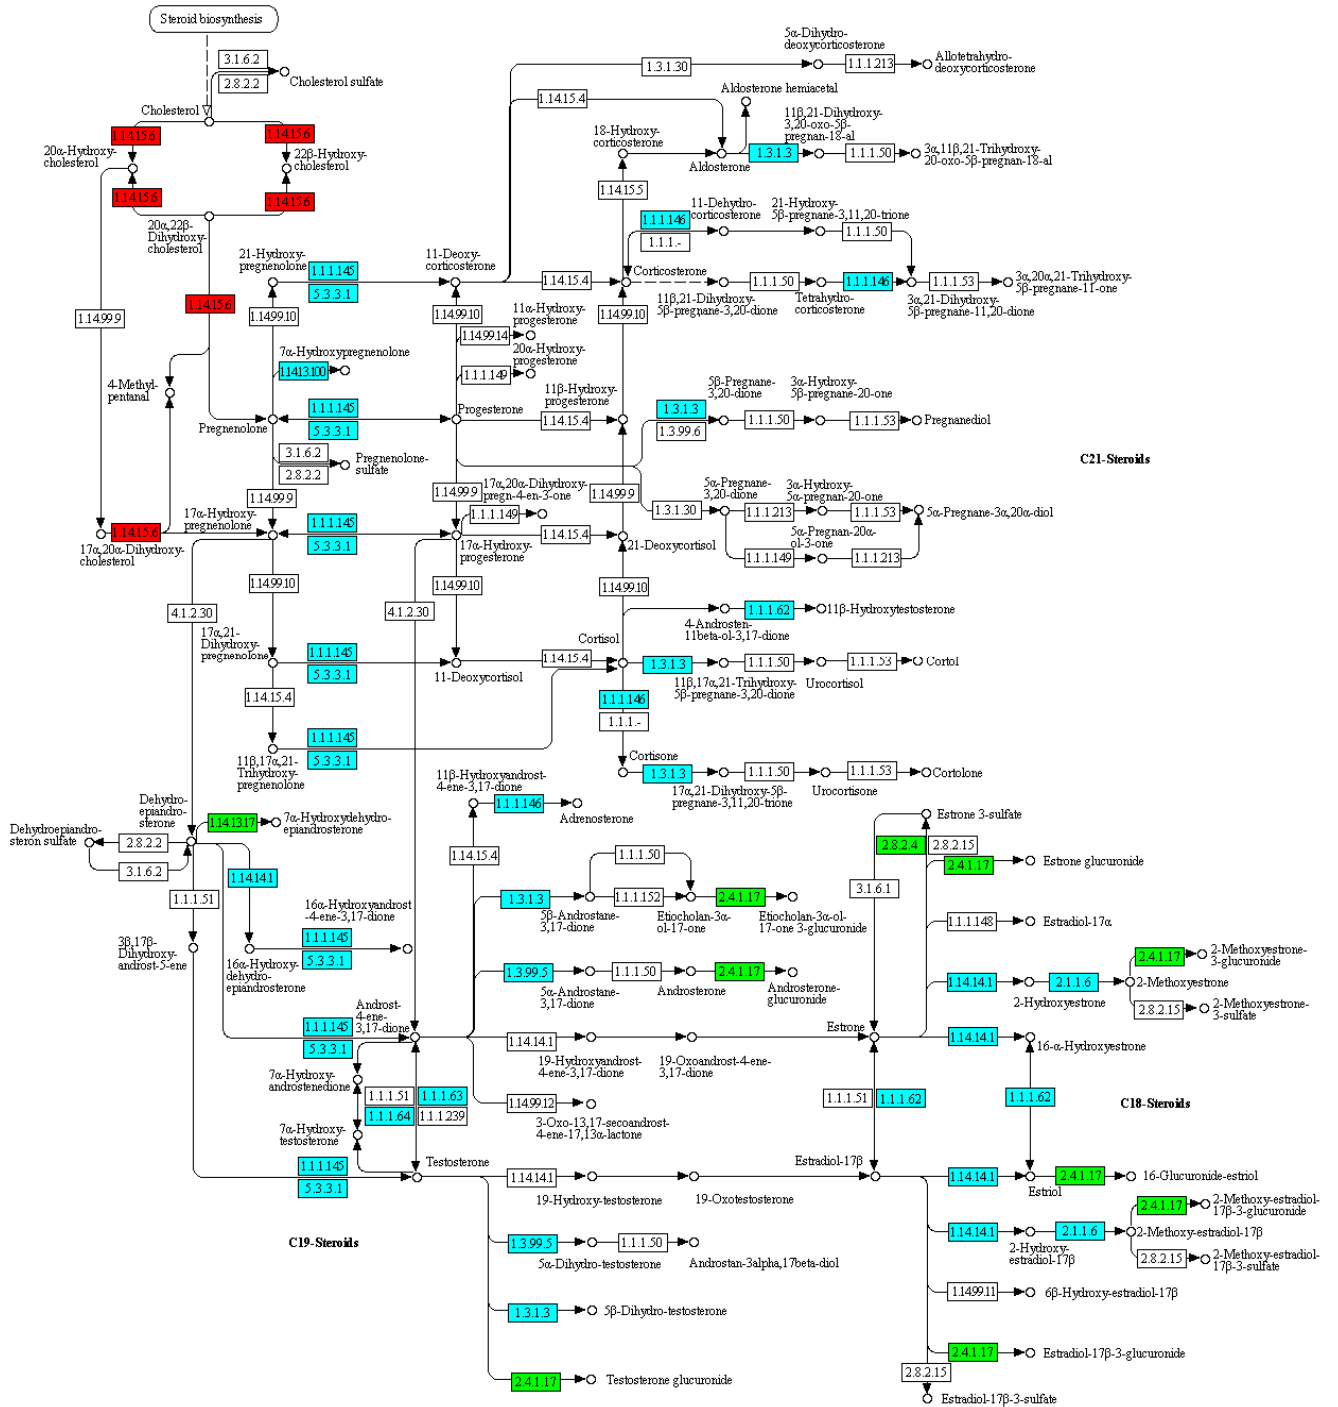

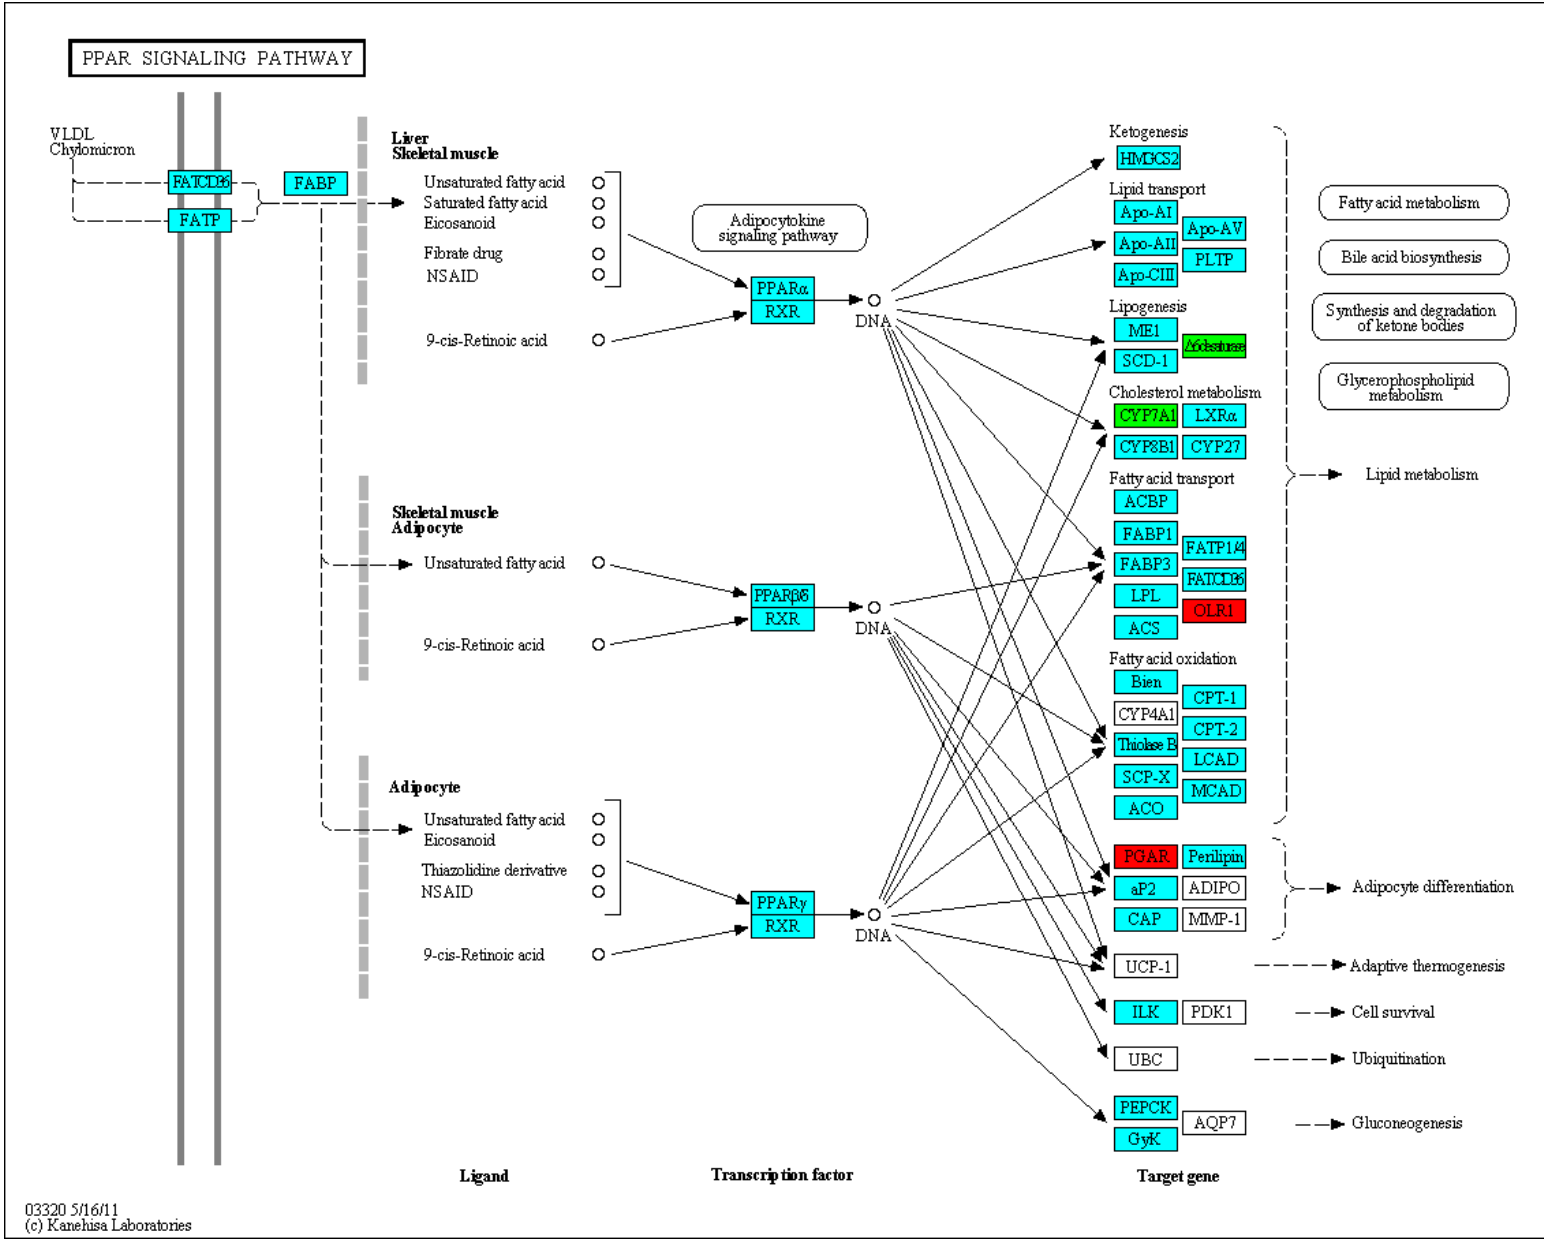

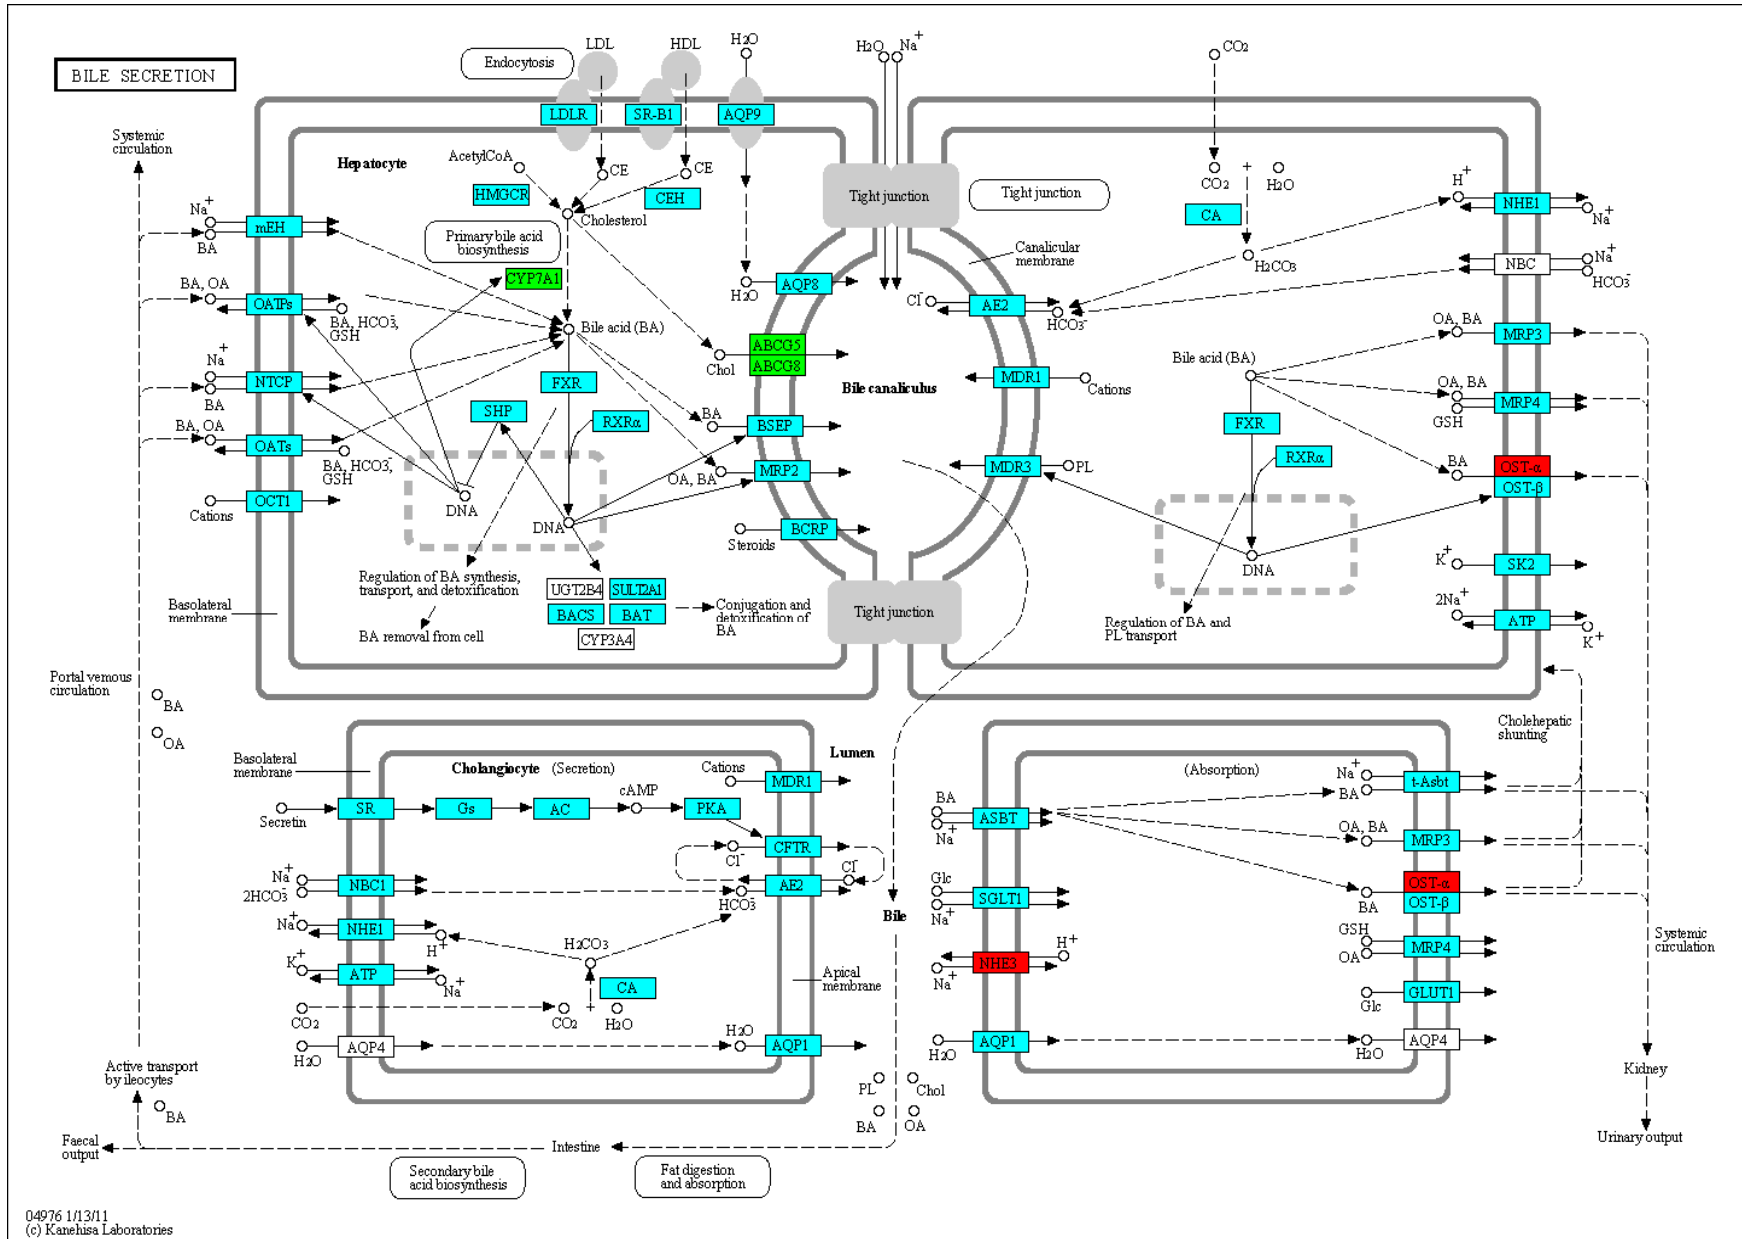

# VITAMIN DIGESTION AND ABSORPTION

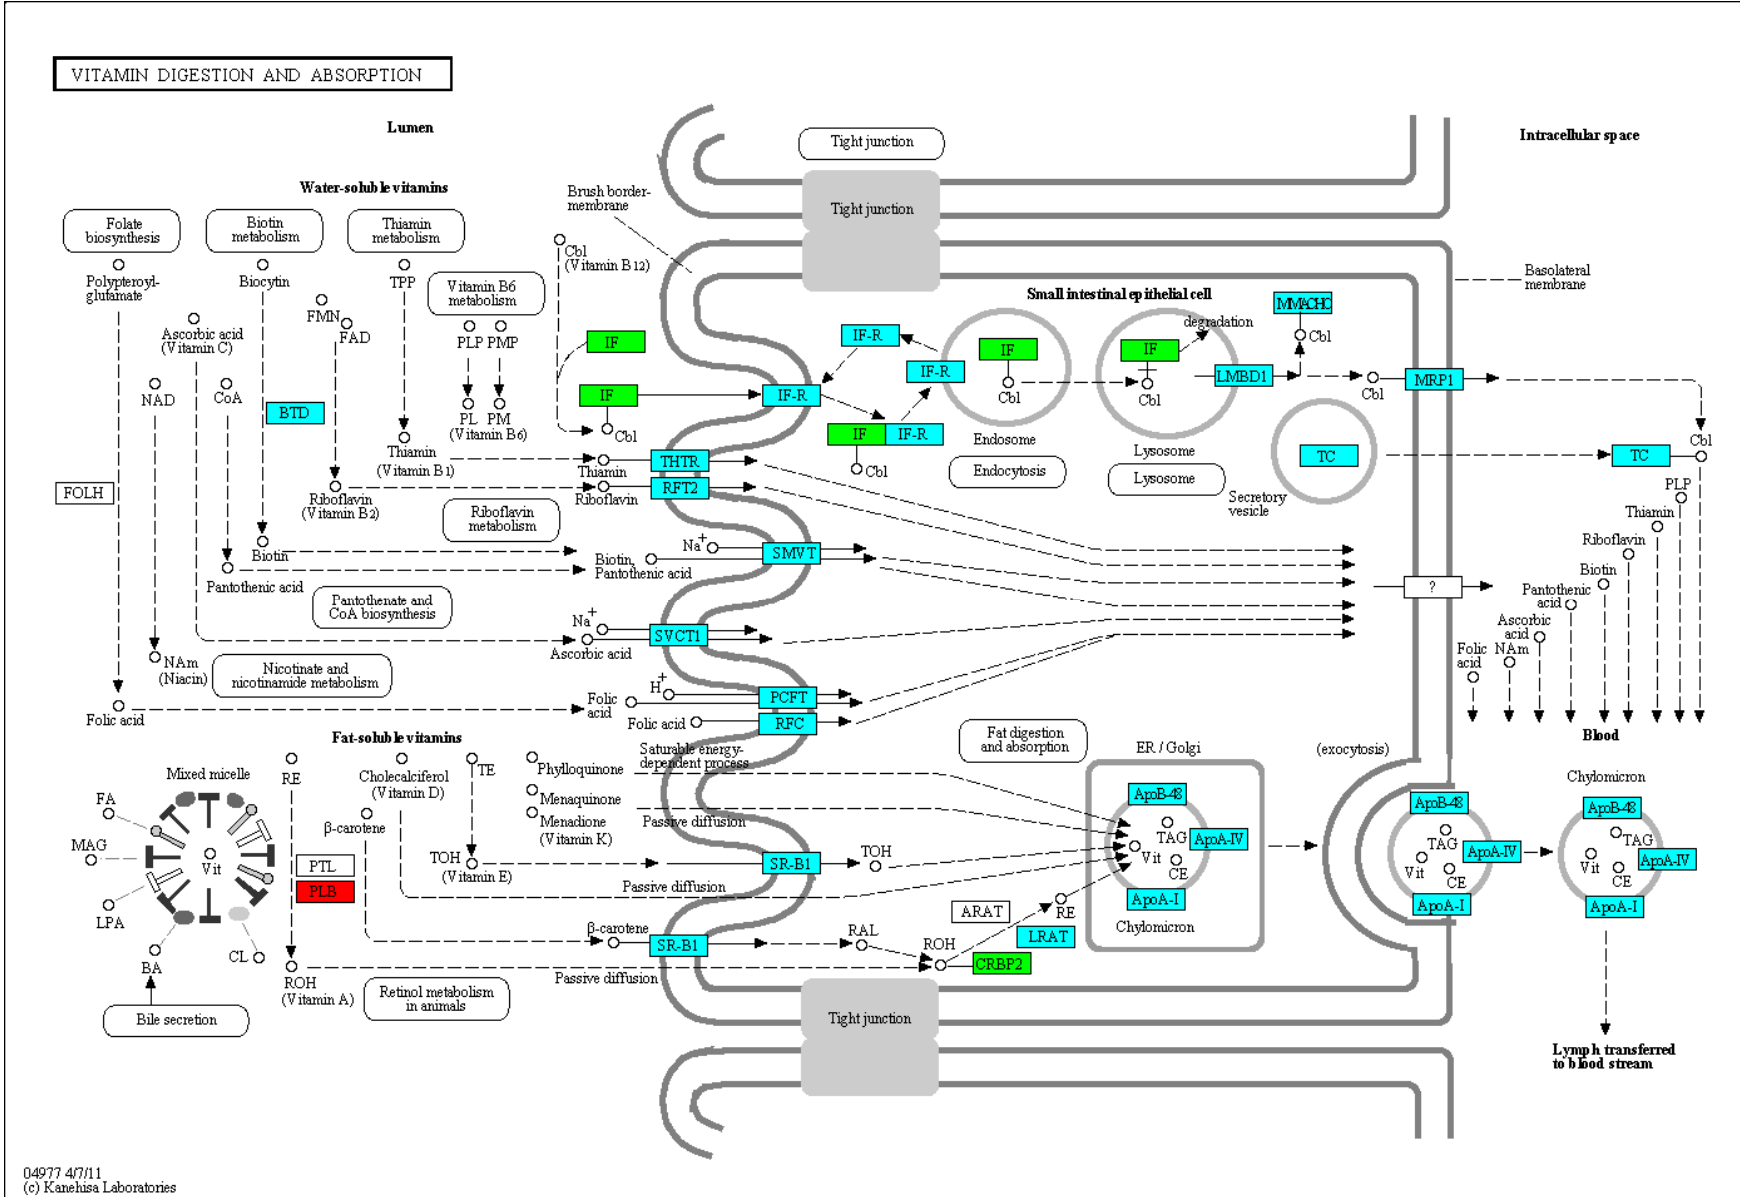

**FAT DIGESTION AND ABSORPTION**

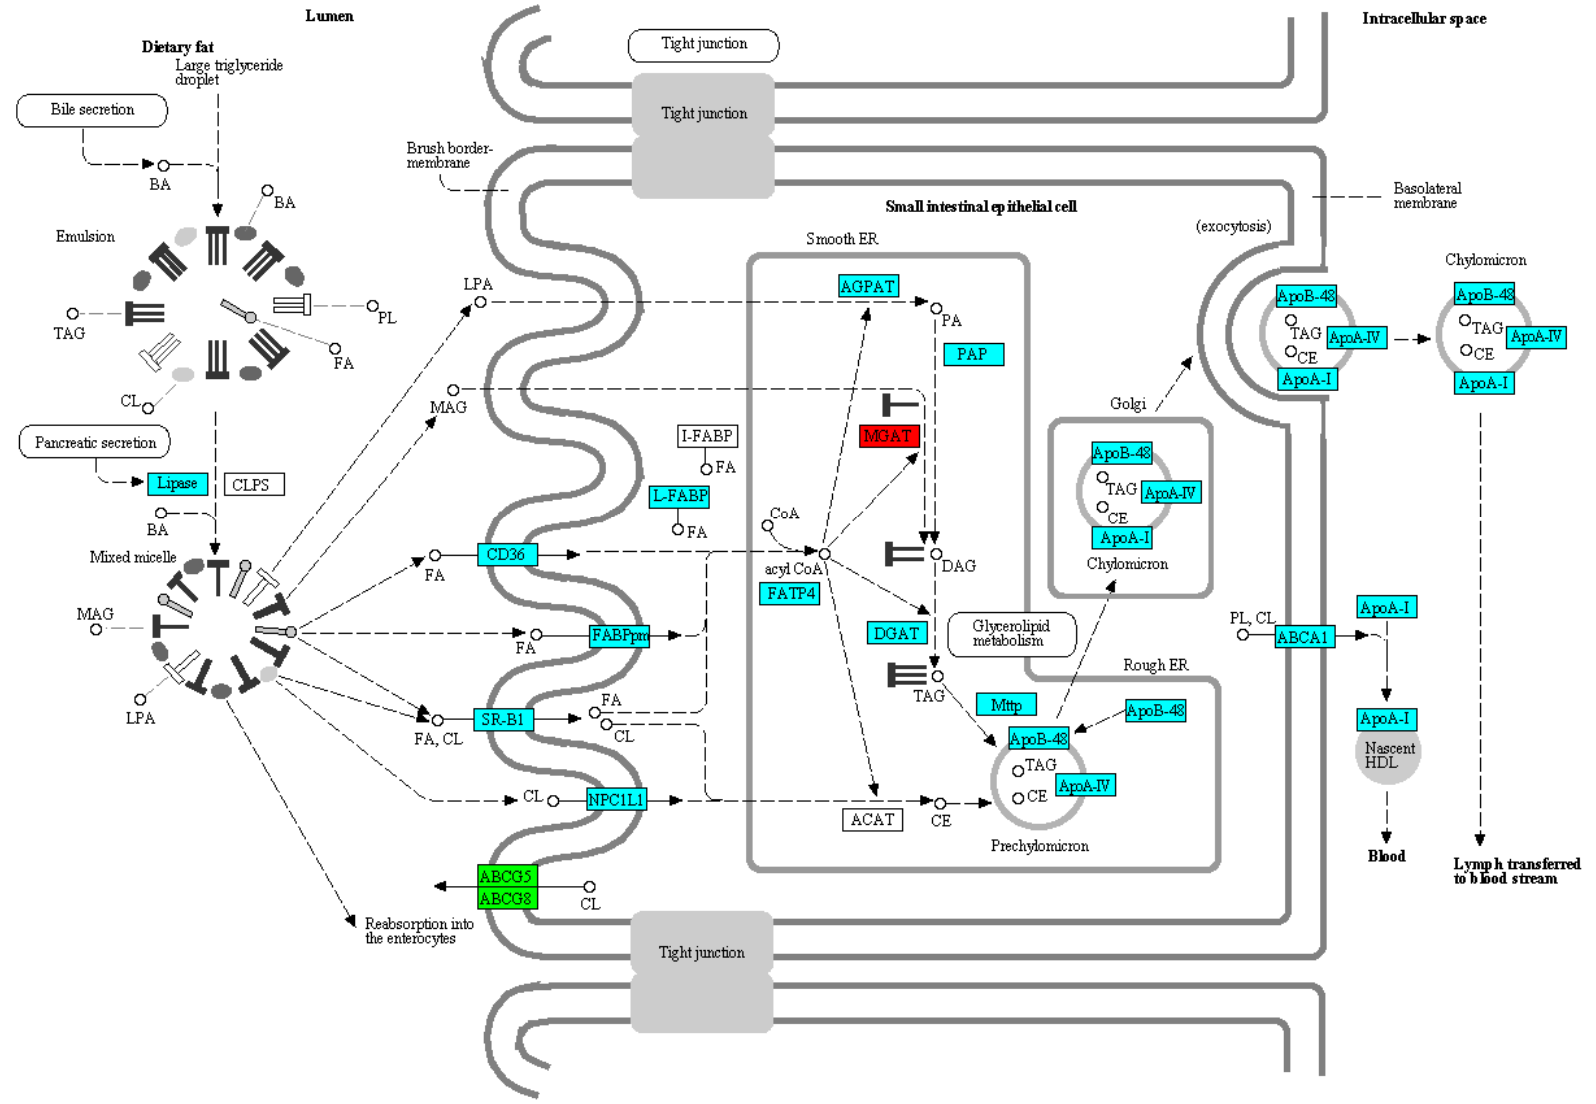

**ABC TRANSPORTERS**

**Prokaryotic-type ABC transporters**

**Mineral and organic ion transporters**

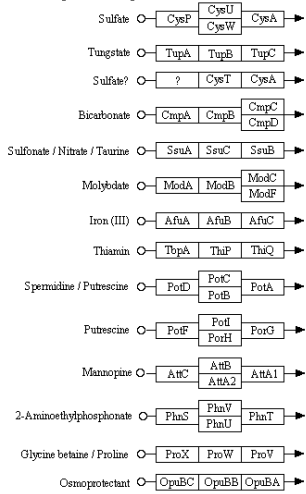

**Oligosaccharide and polyol transporters**

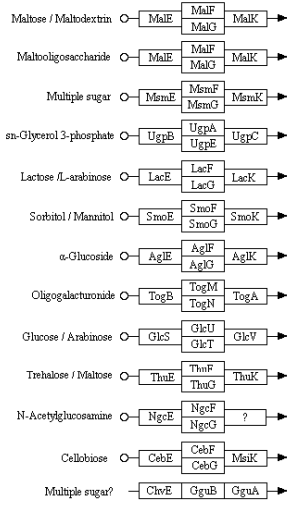

**Monosaccharide transporters**

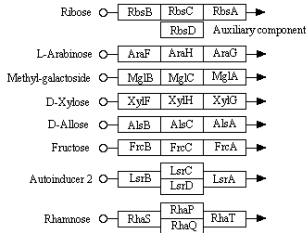

**Phosphate and amino acid transporters**

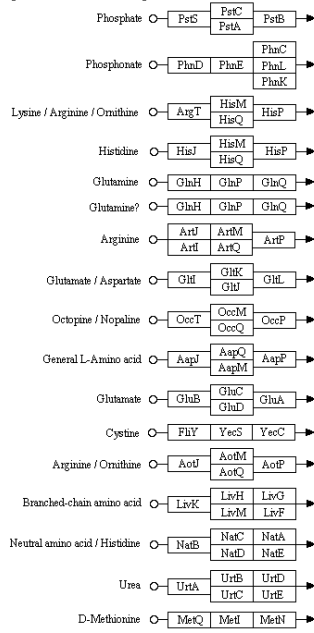

**Peptide and nickel transporters**

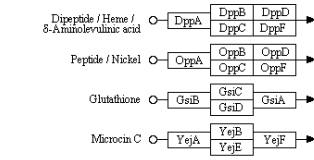

**Metallic cation, iron-siderophore and vitamin B12 transporters**

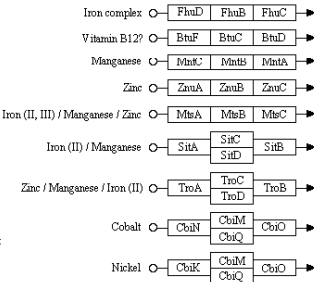

**ABC-2 and other transporters**

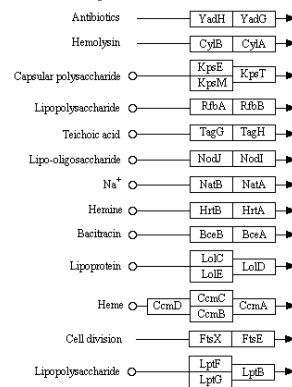

**Eukaryotic-type ABC transporters**

**ABCA Sub family**

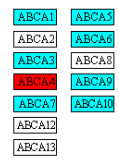

**ABCB Sub family**

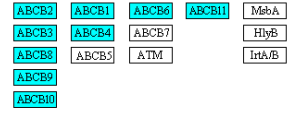

**ABCC Sub family**

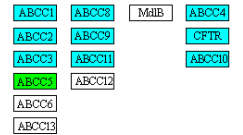

**ABCD Sub family**

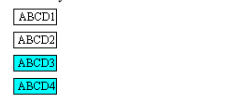

**ABCG Sub family**

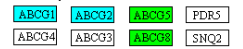

**Macrolide exporters**

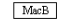

**Other putative ABC transporters**

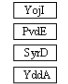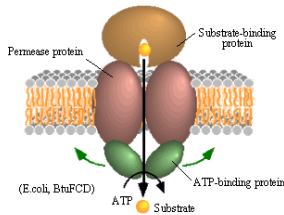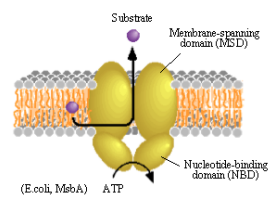

**α-LINOLENIC ACID METABOLISM**

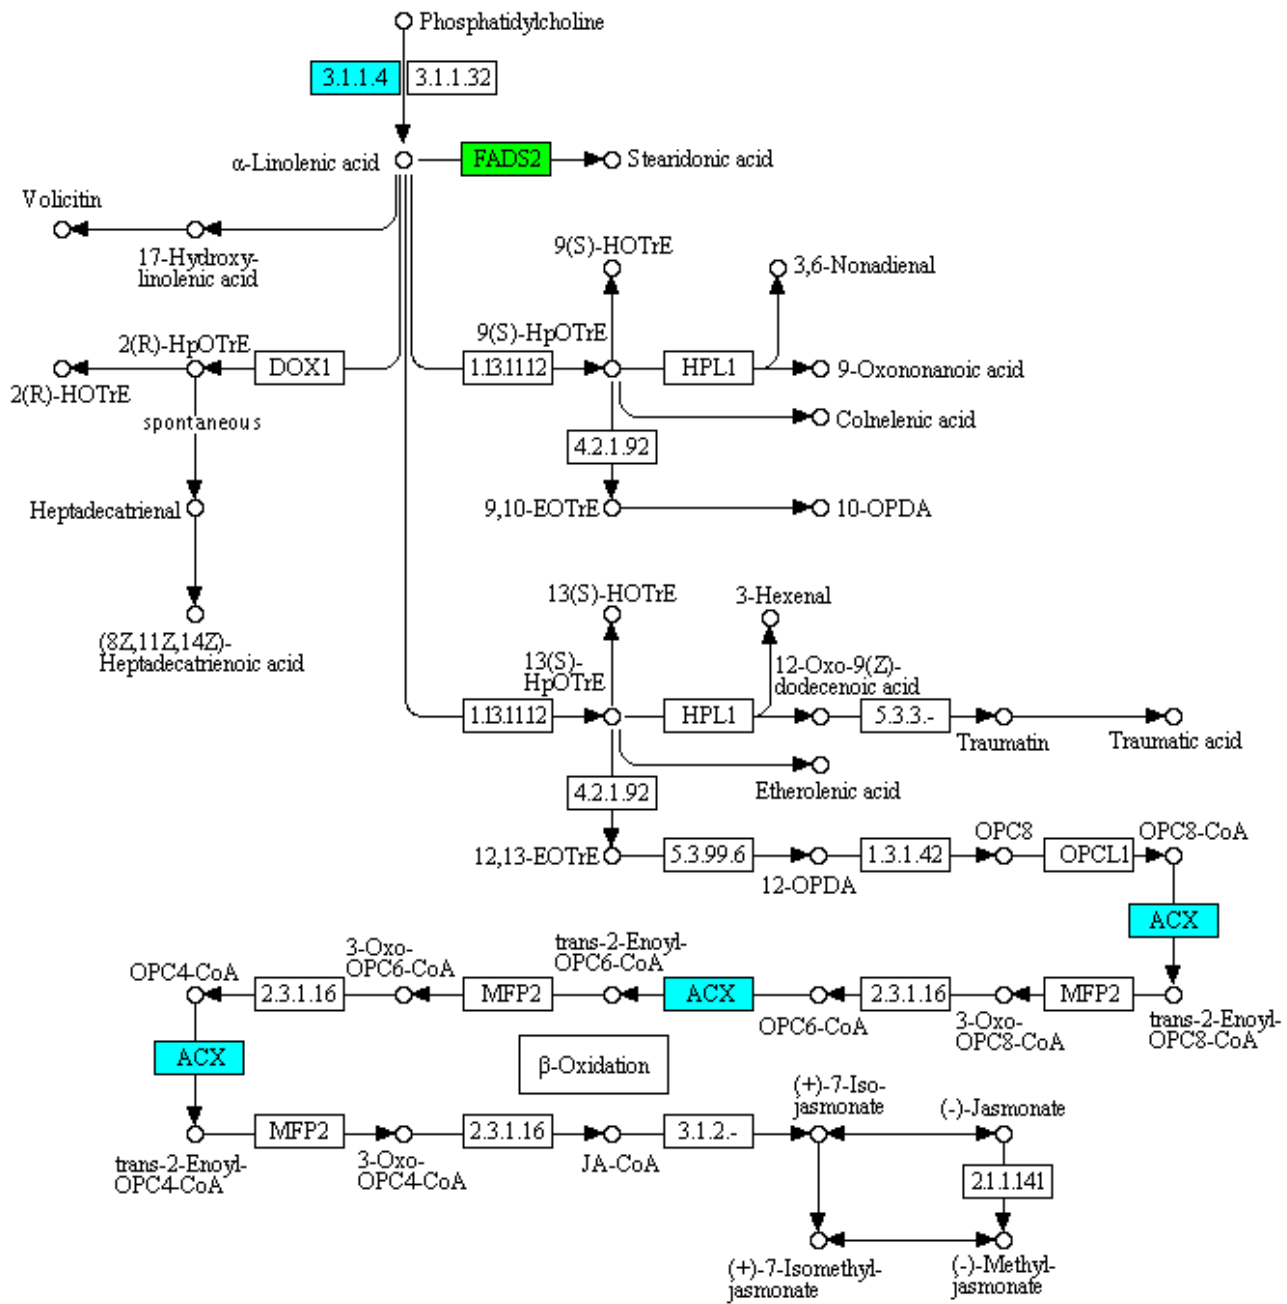

# BIOSYNTHESIS OF UNSATURATED FATTY ACIDS

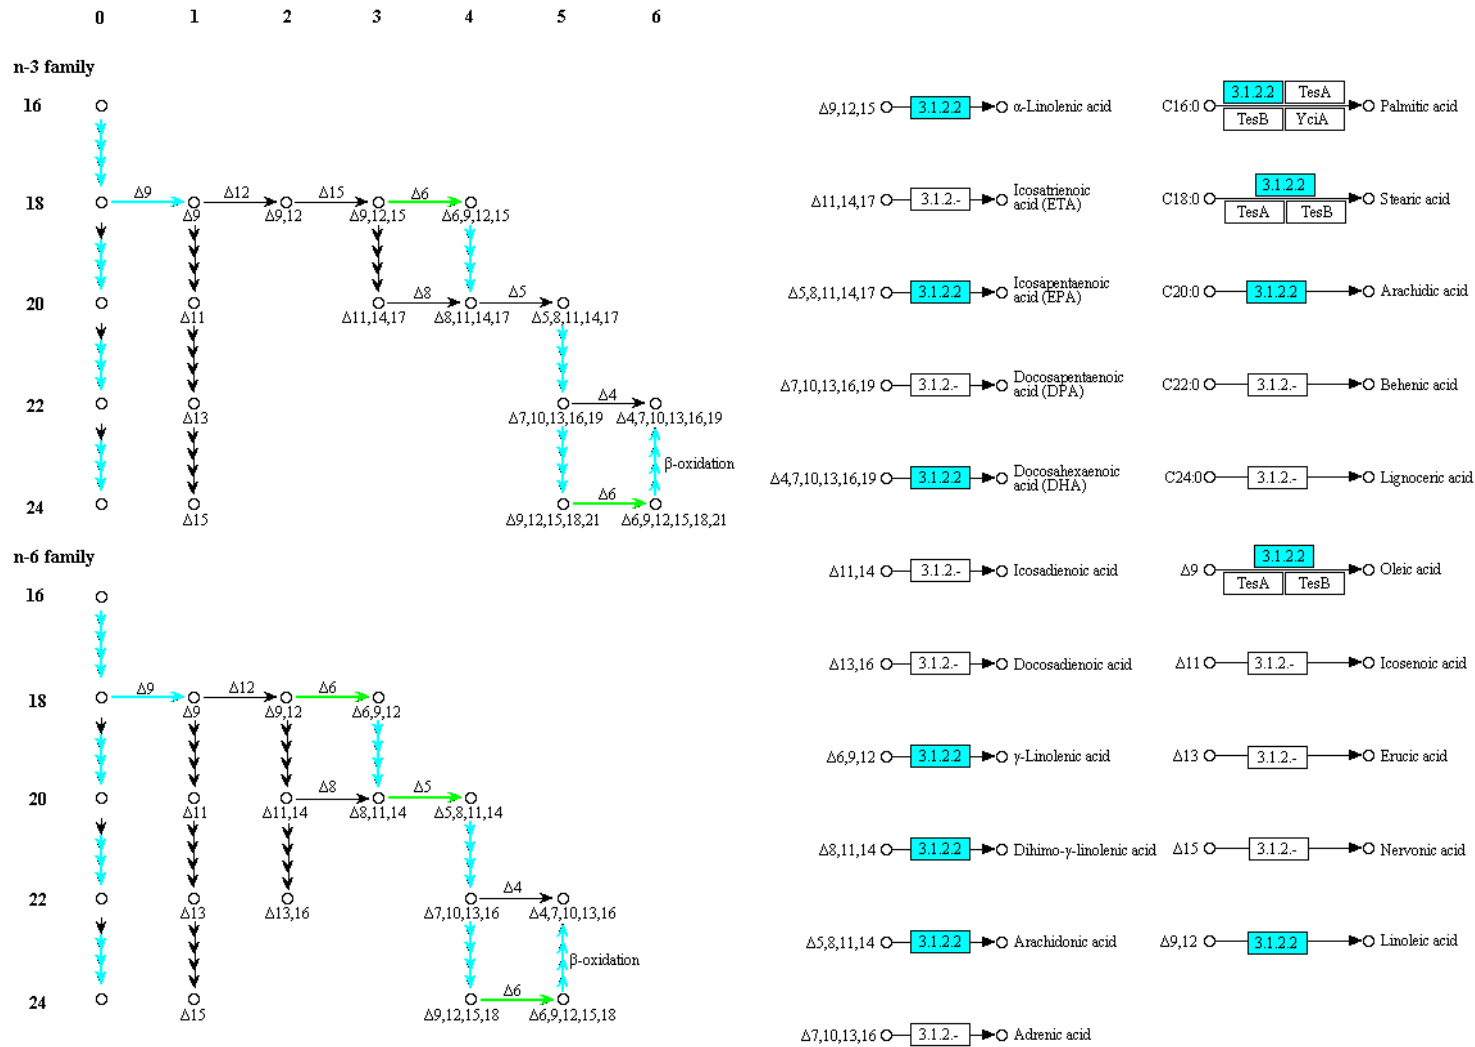



# RETINOL METABOLISM IN ANIMALS

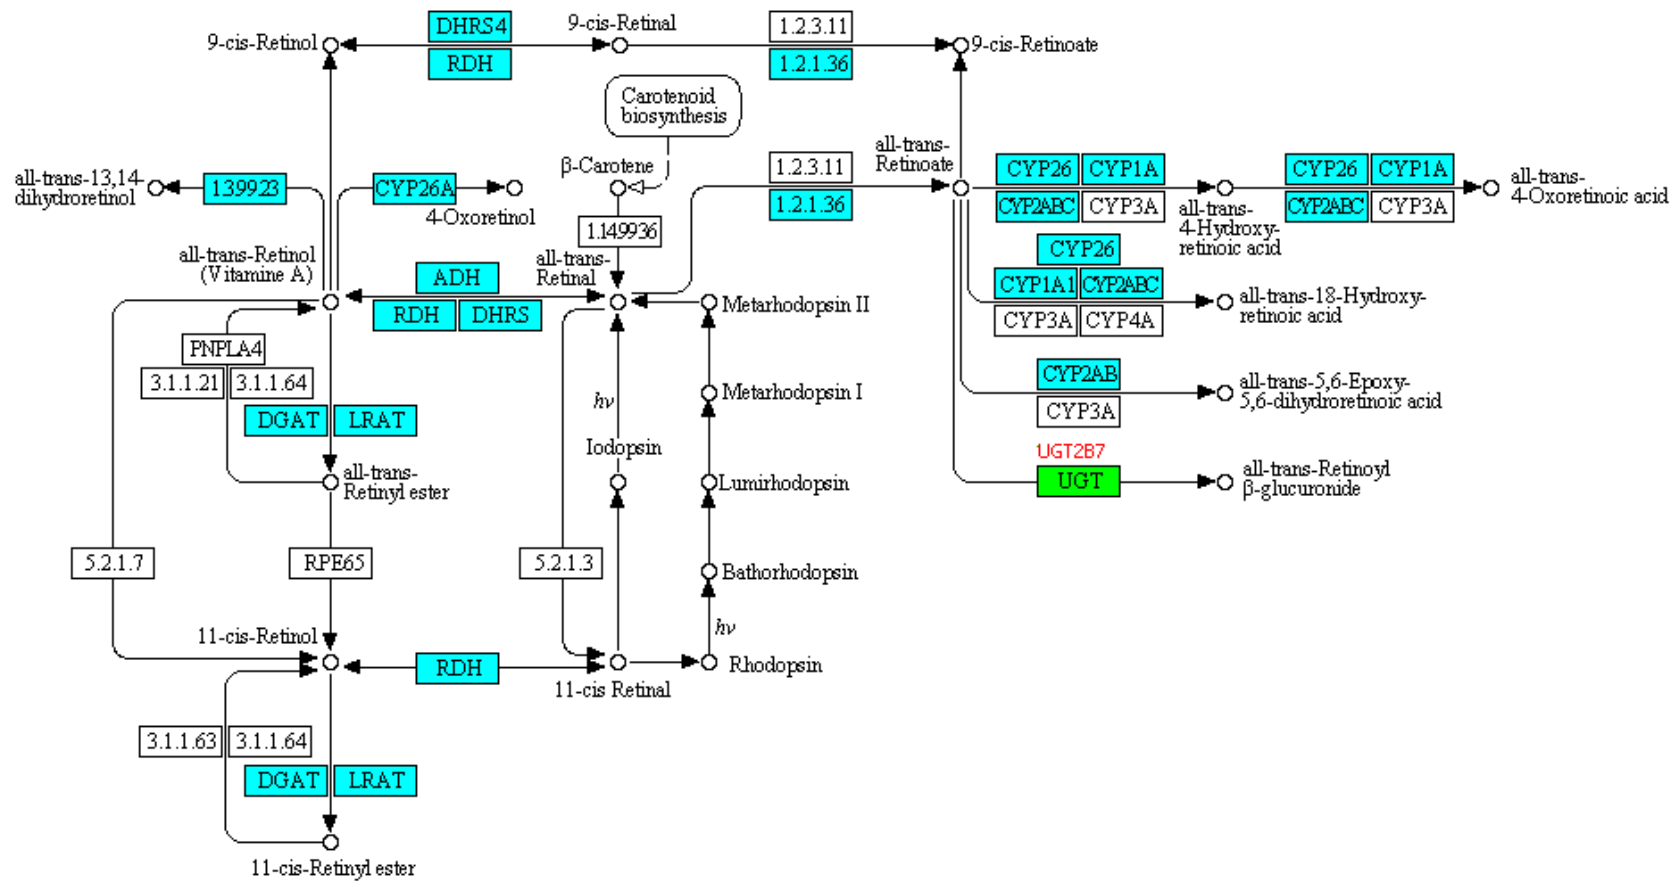

Supplement: 1471-2164-13-193-S4.pdf [file 1471-2164-13-193-S4.pdf]
