# Supplementary material for: RNA-seq analysis of differential gene expression in liver from lactating dairy cows divergent in negative energy balance
Source: PubMed Central journal article supplement (PMC3465249; doi:10.1186/1471-2164-13-193), 2012-05-20

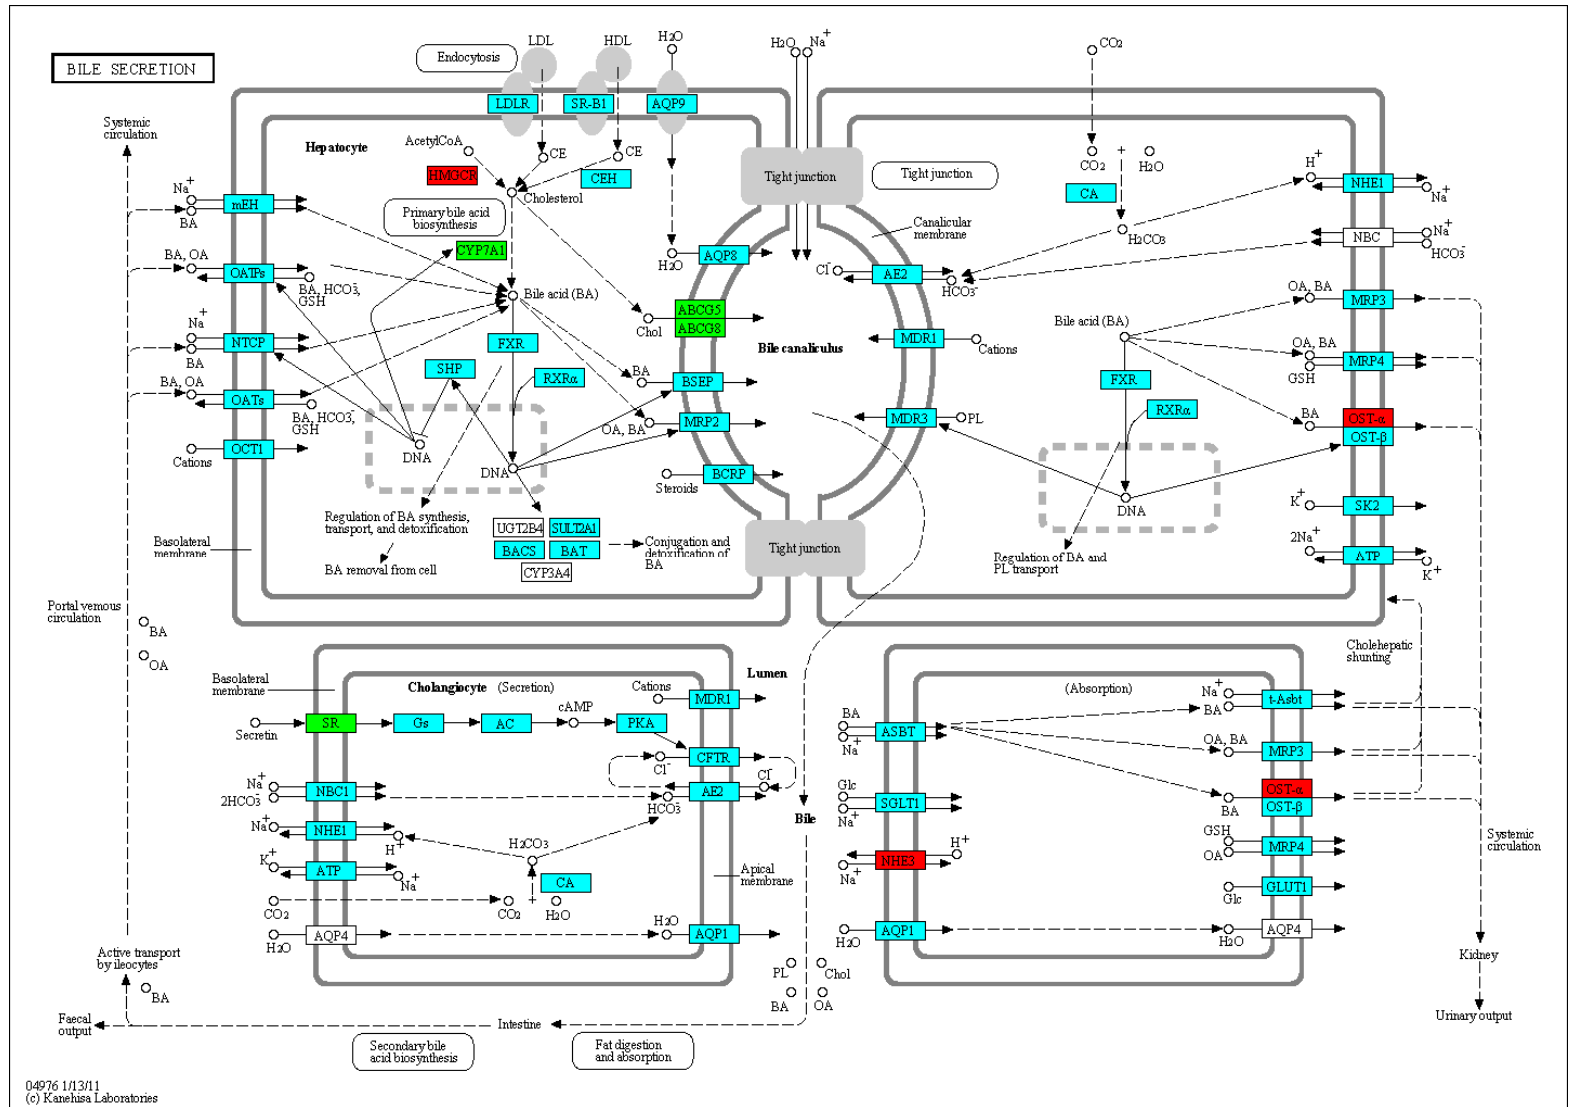

**STEROID HORMONE BIOSYNTHESIS**

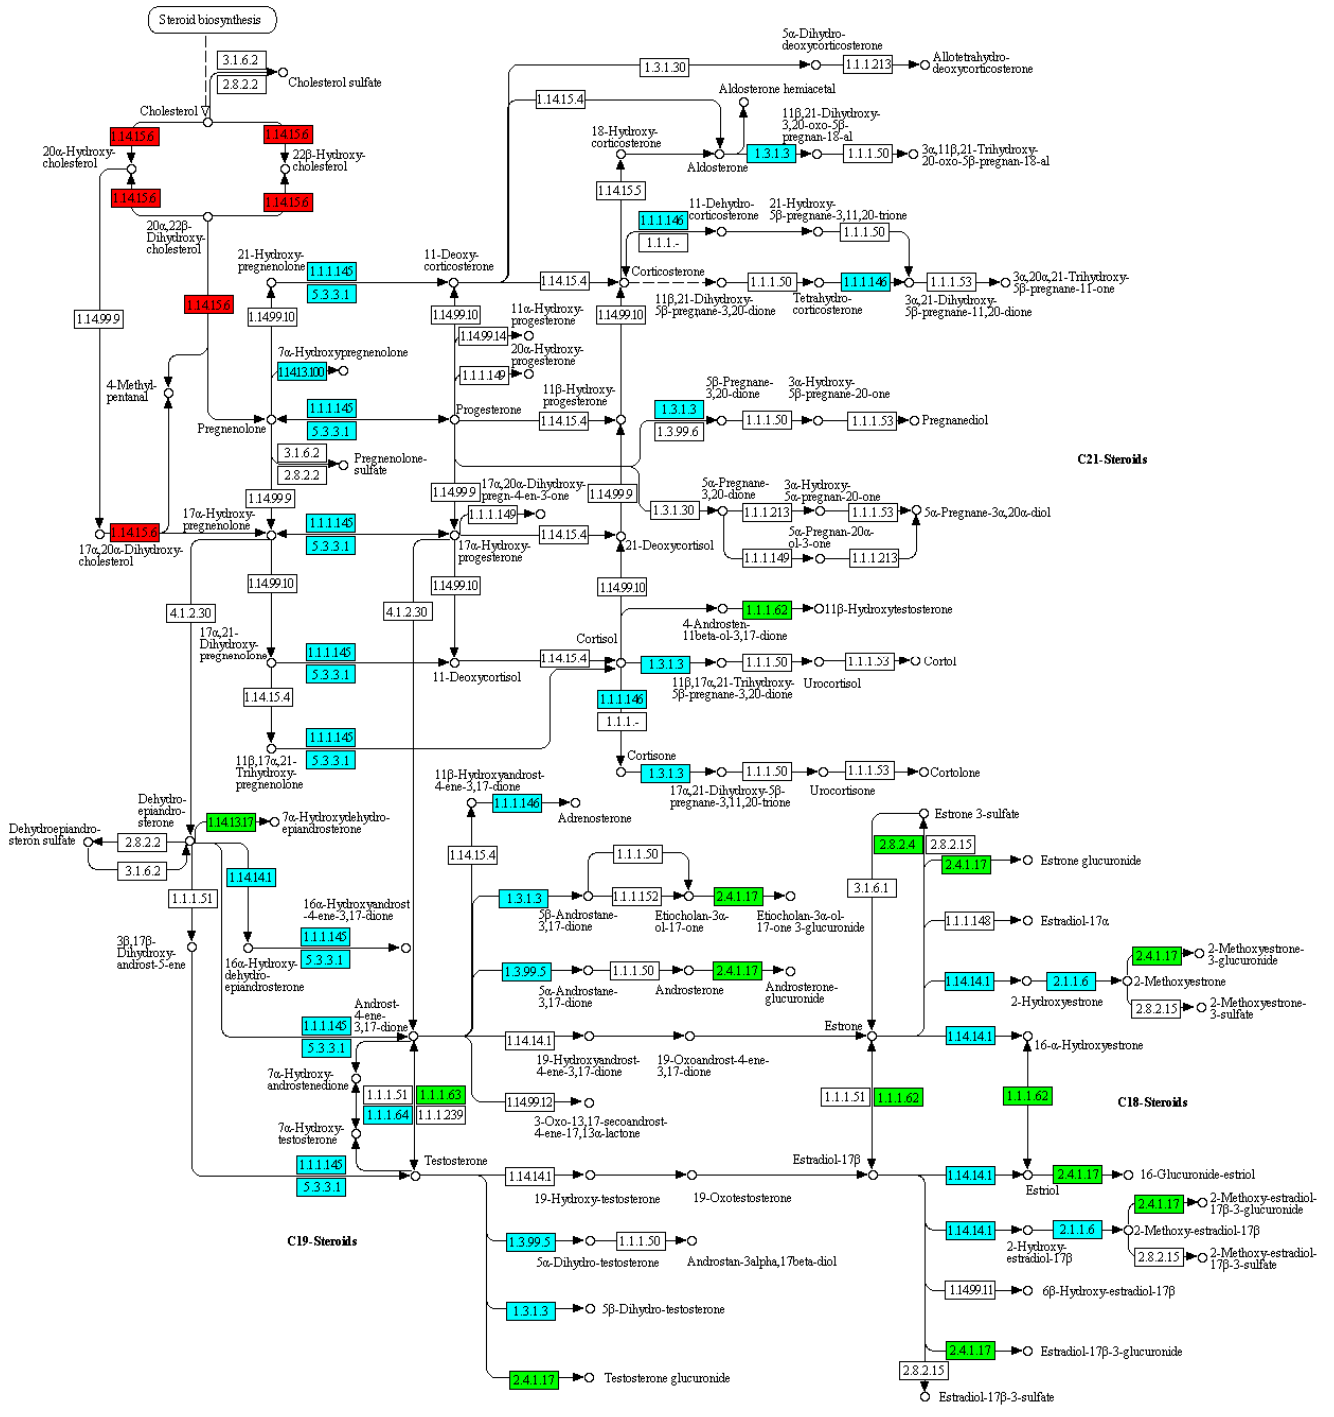

**MATURITY ONSET DIABETES OF THE YOUNG**

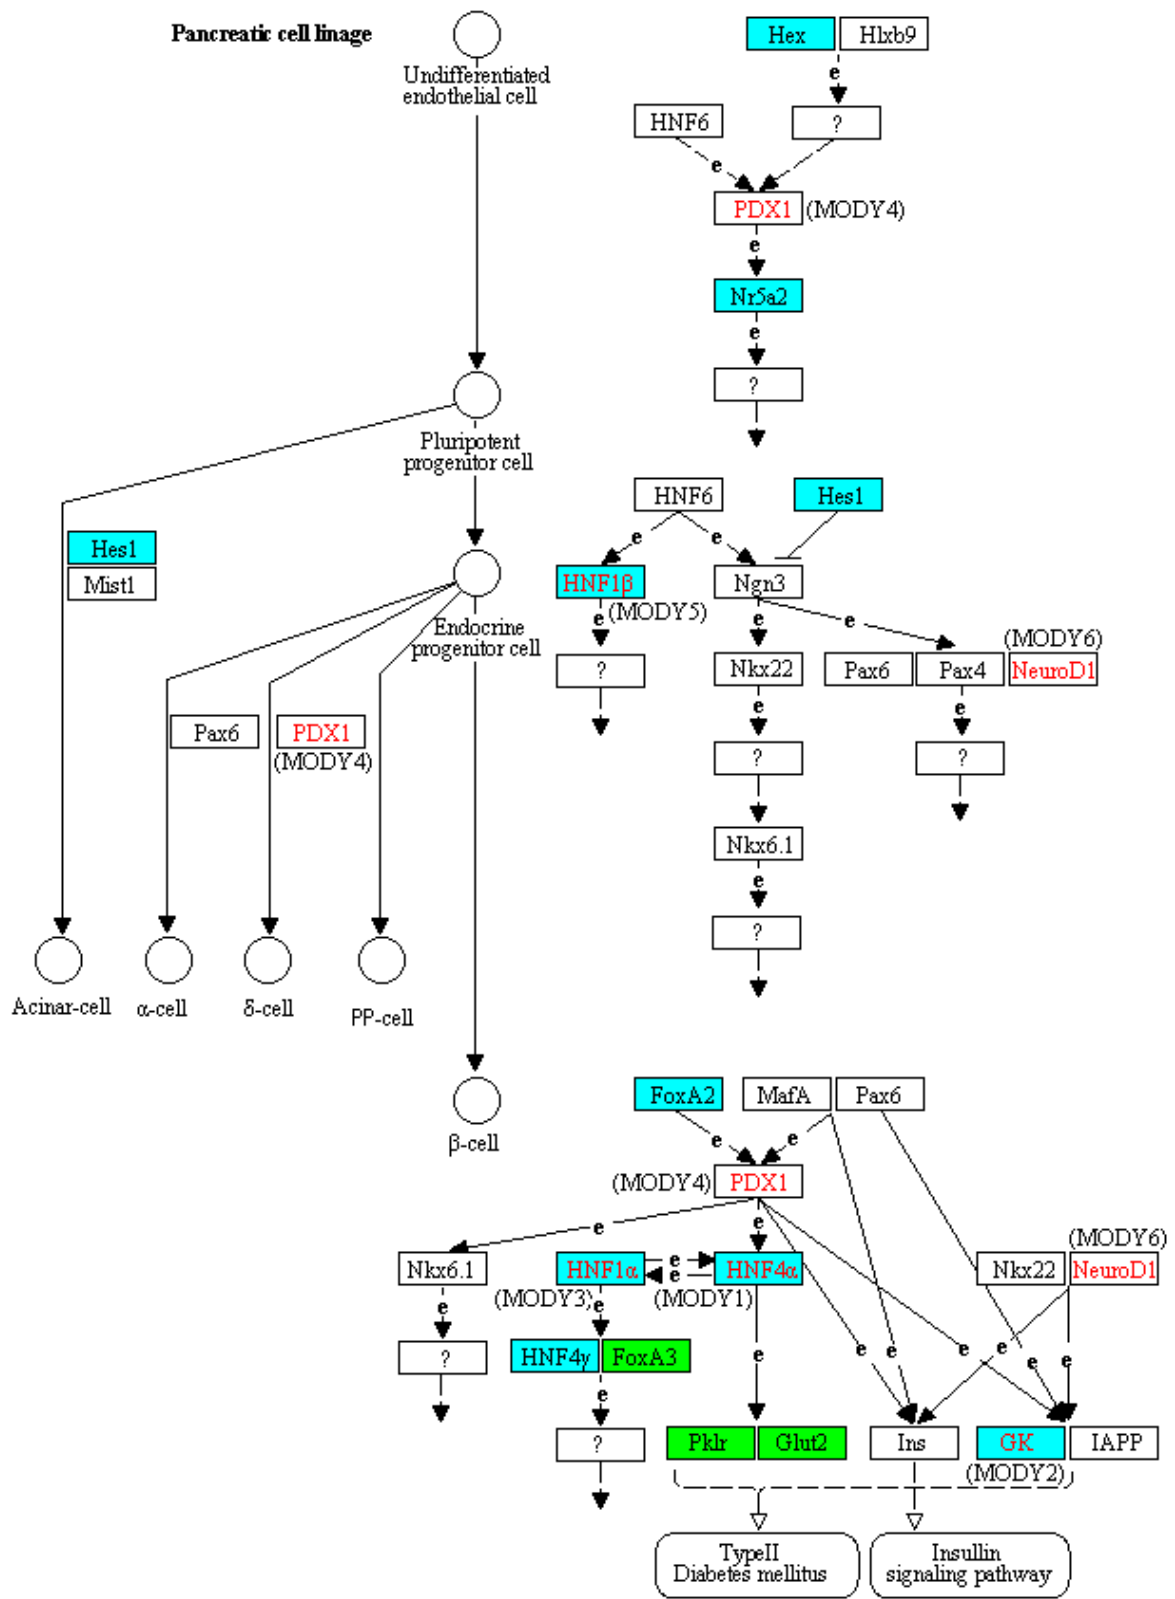

NITROGEN METABOLISM: REDUCTION AND FIXATION

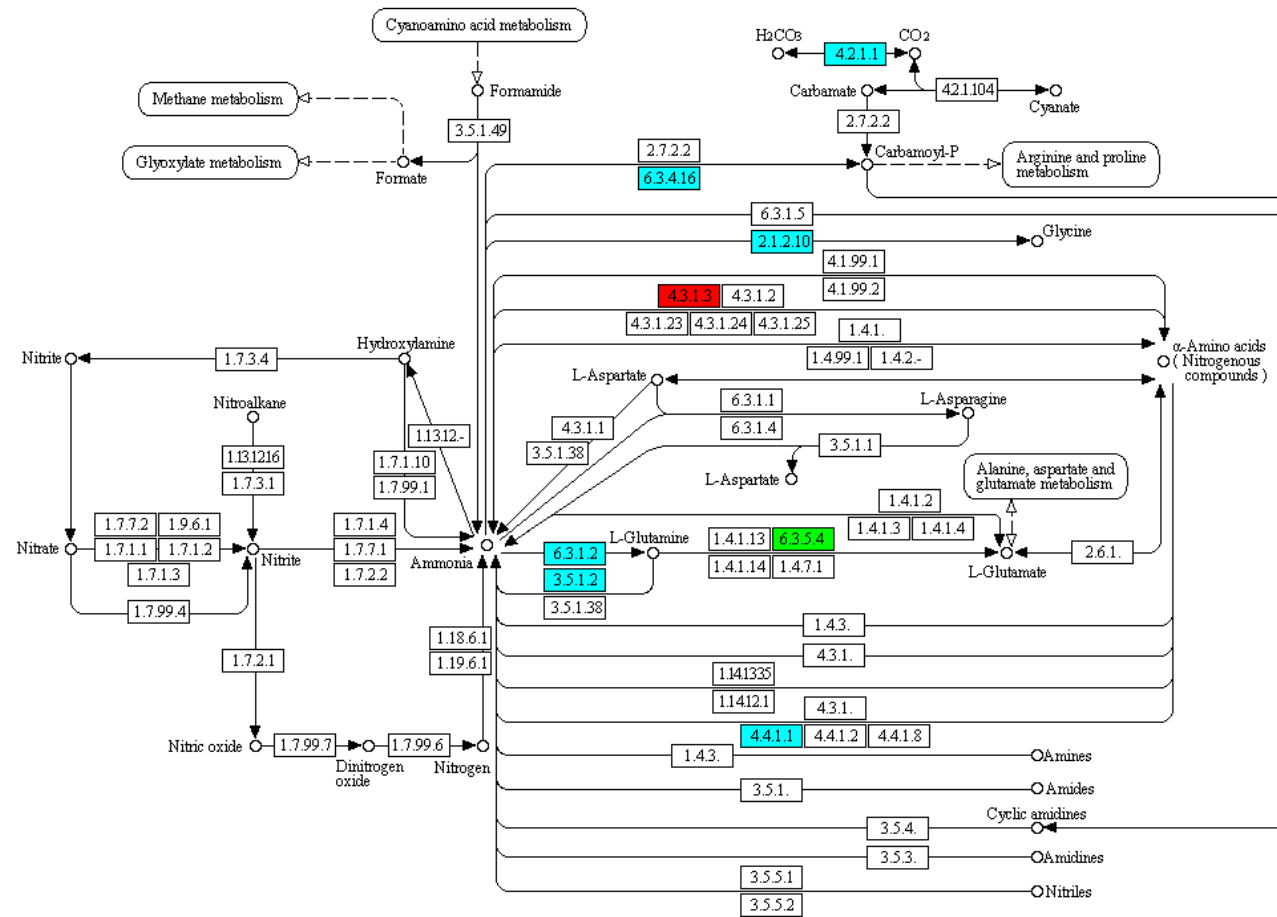

# FATTY ACID BIOSYNTHESIS

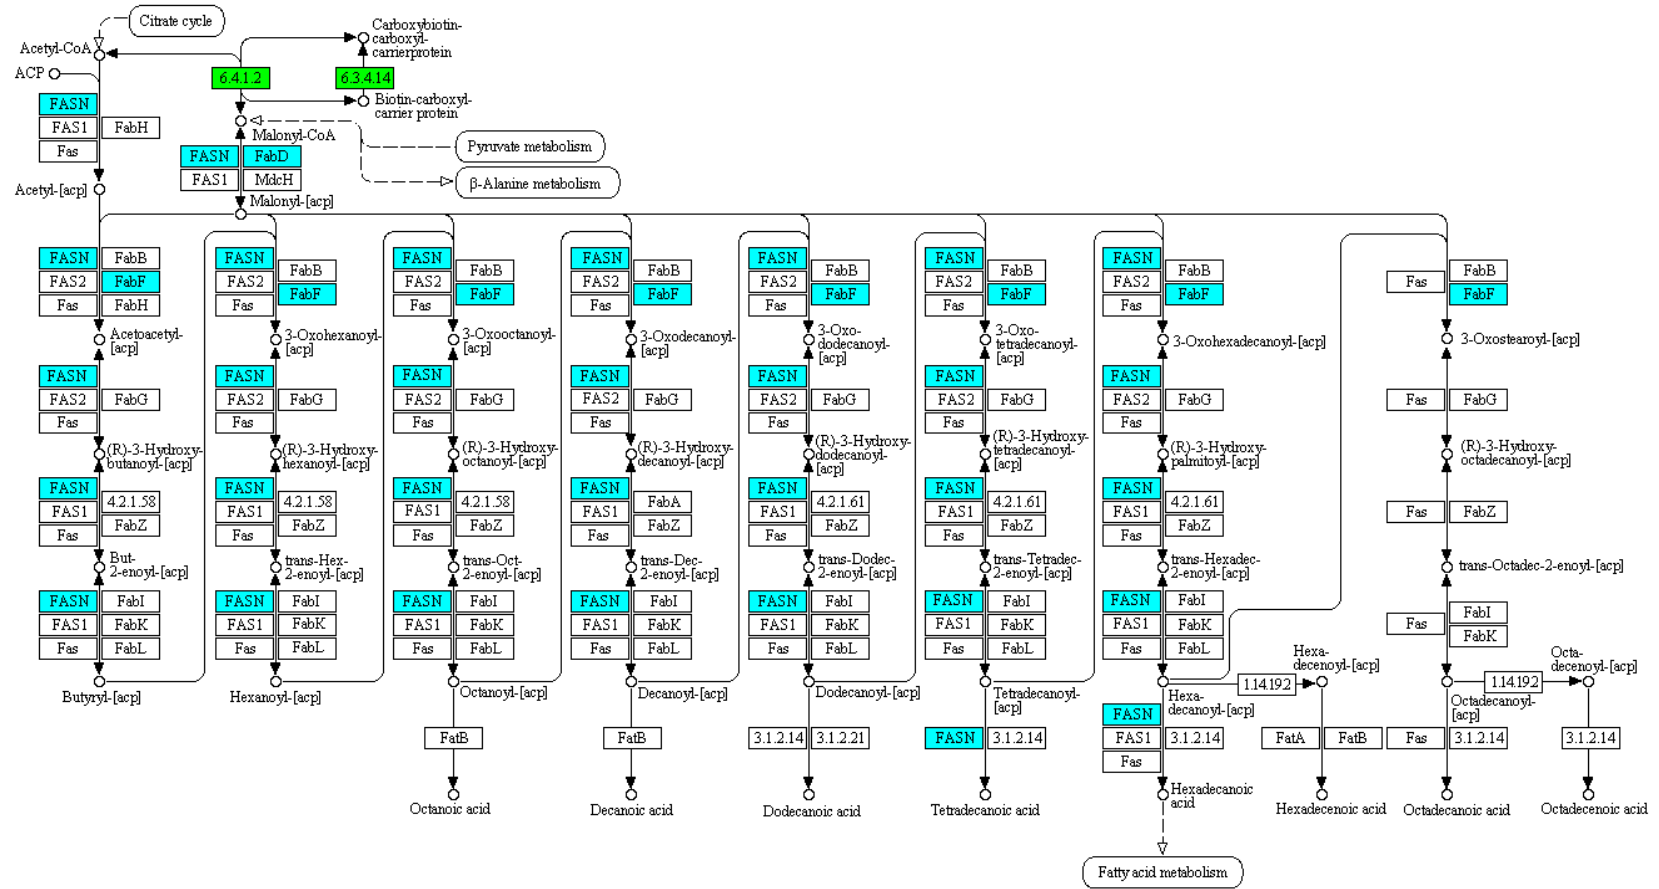

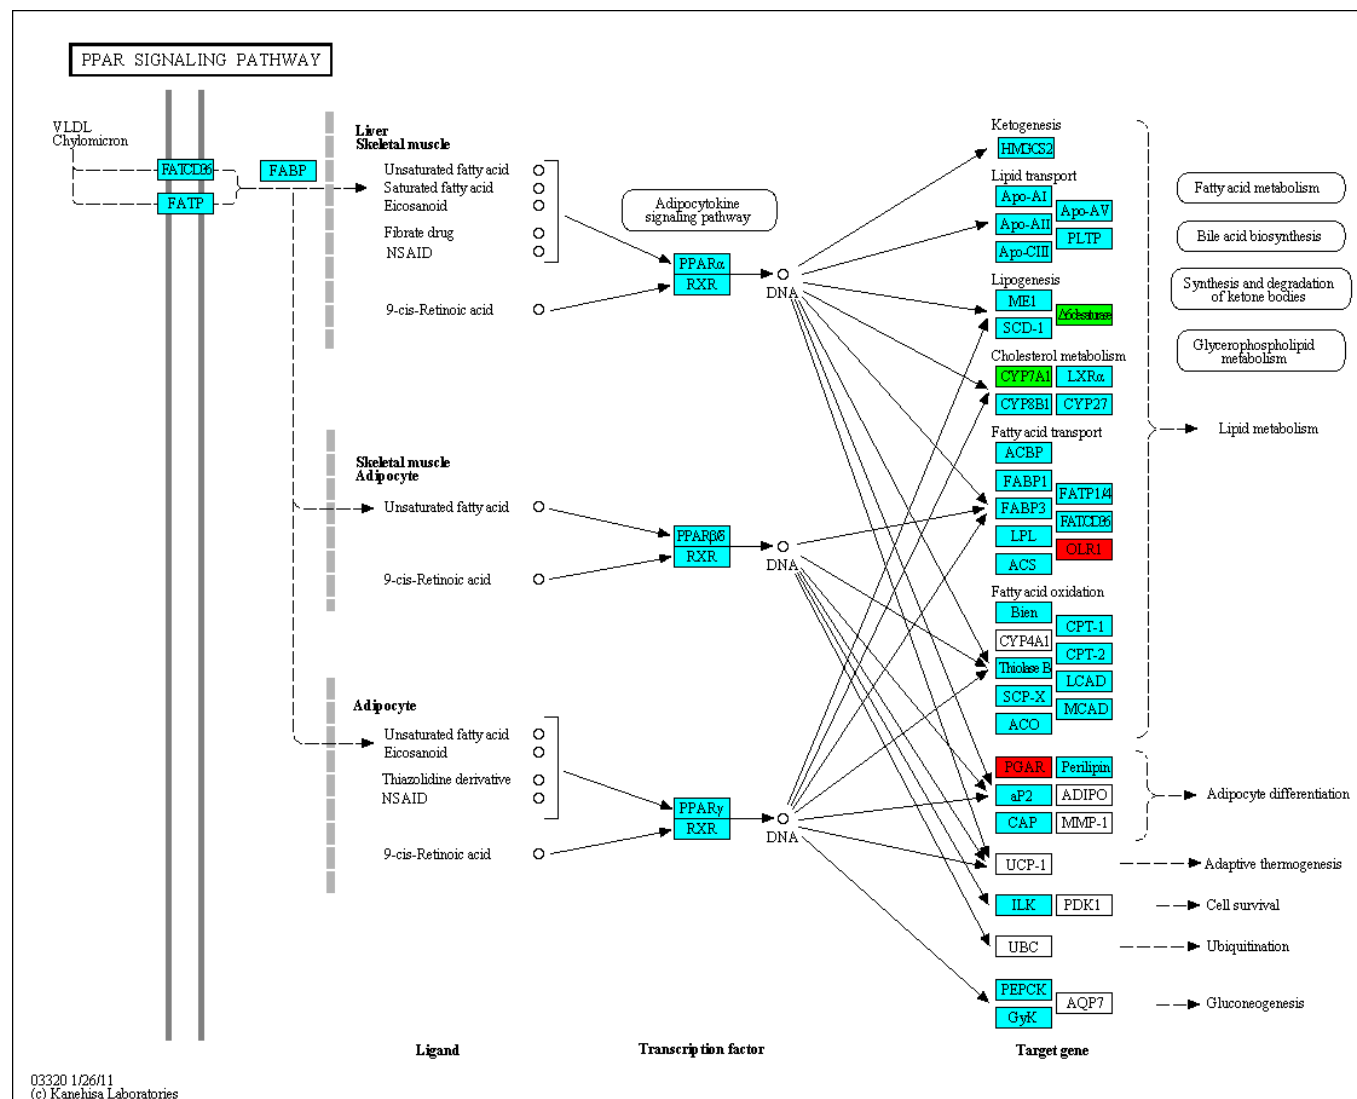

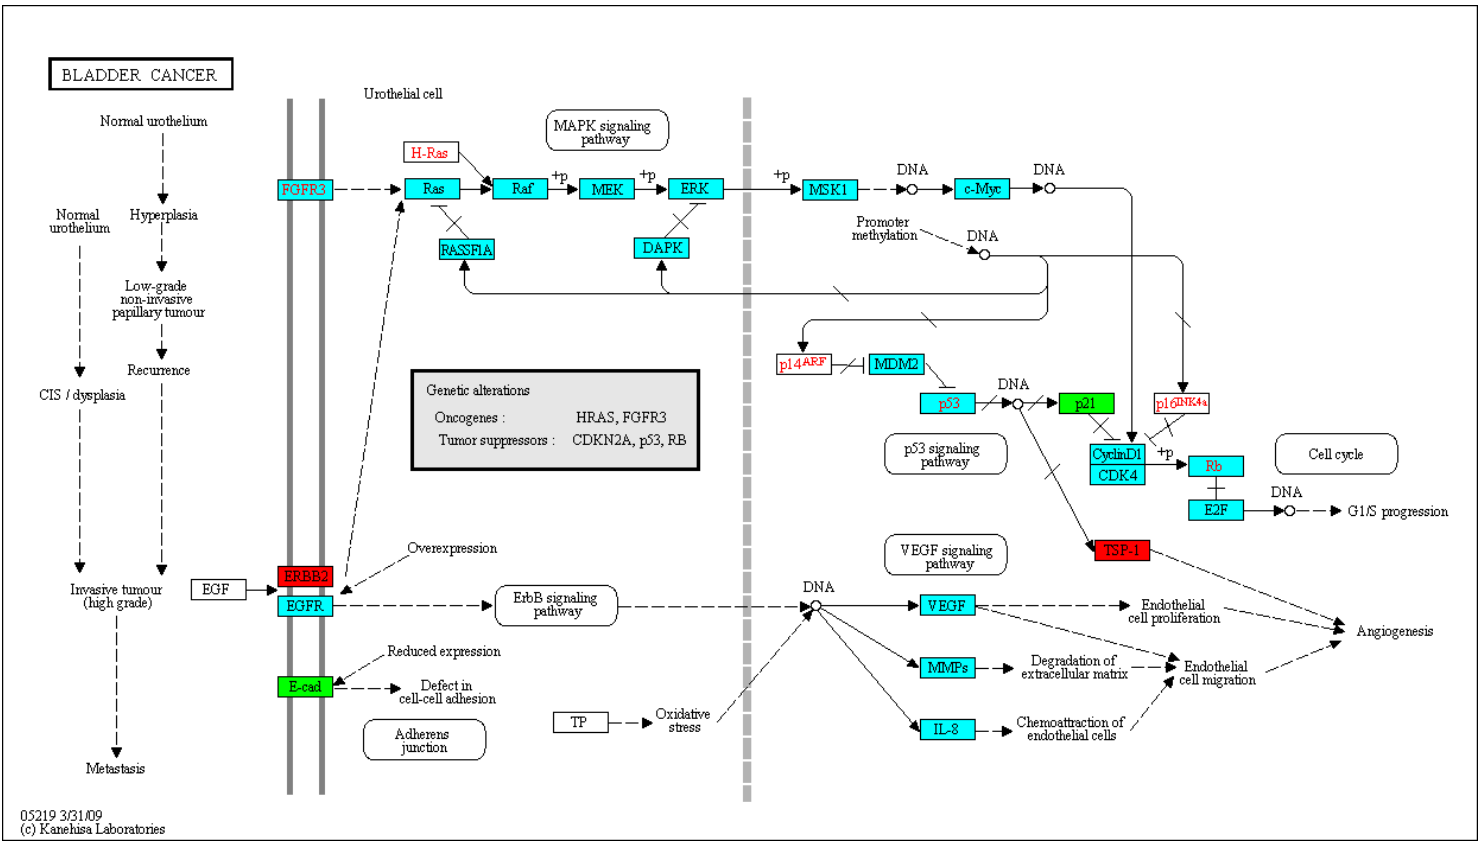

**P53 SIGNALING PATHWAY**

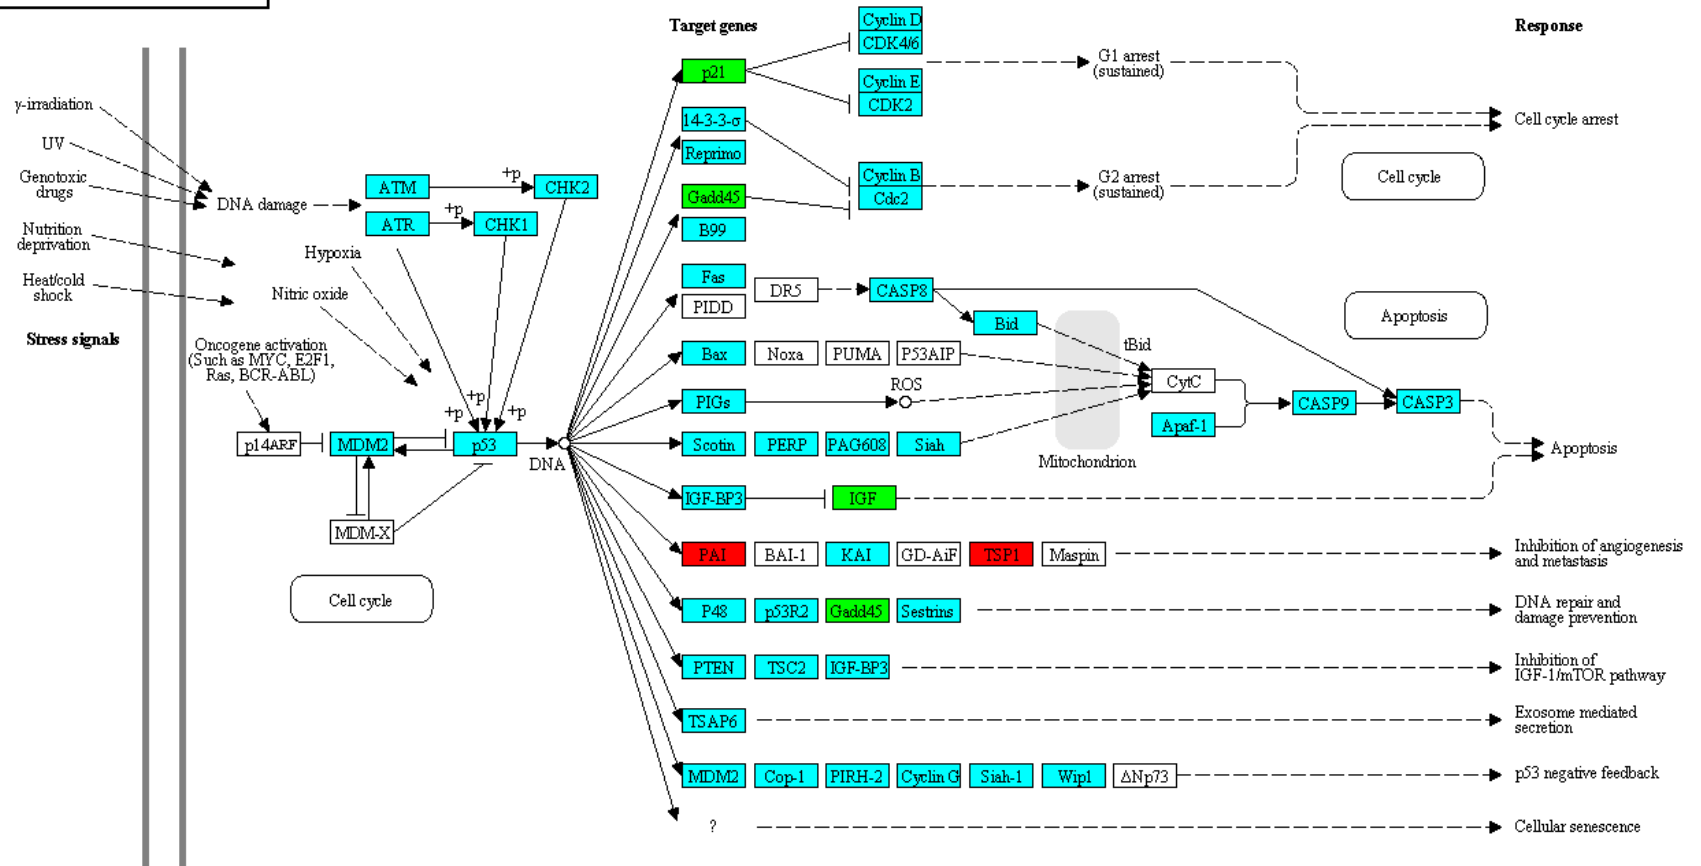



# INSULIN SIGNALING PATHWAY

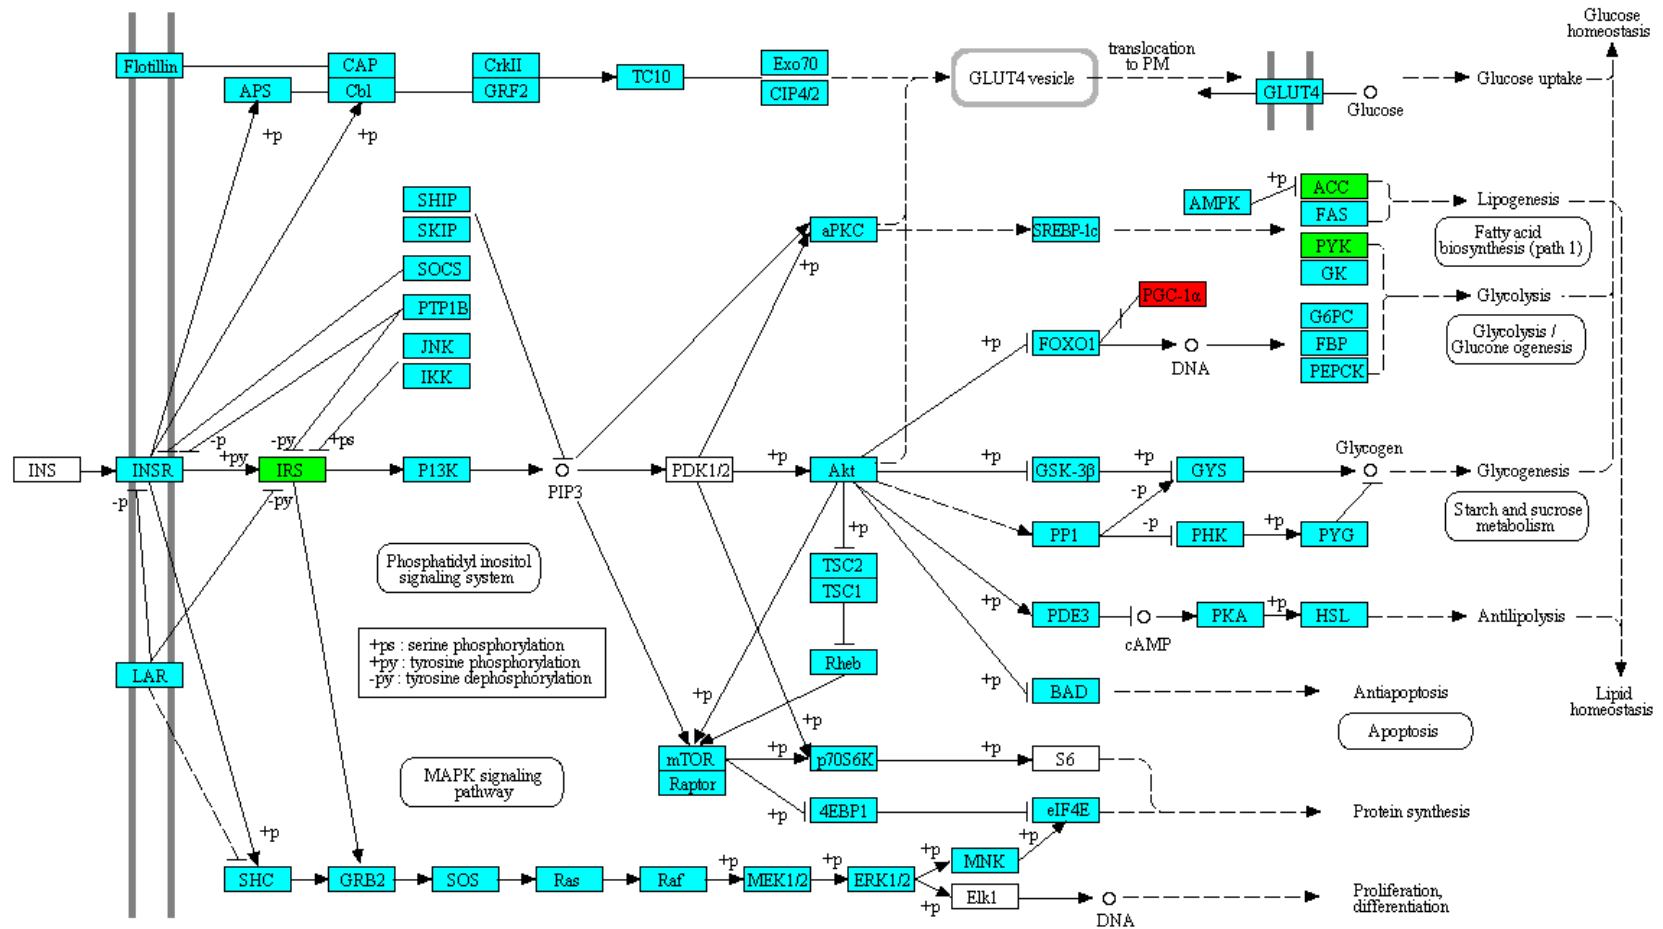

VITAMIN DIGESTION AND ABSORPTION

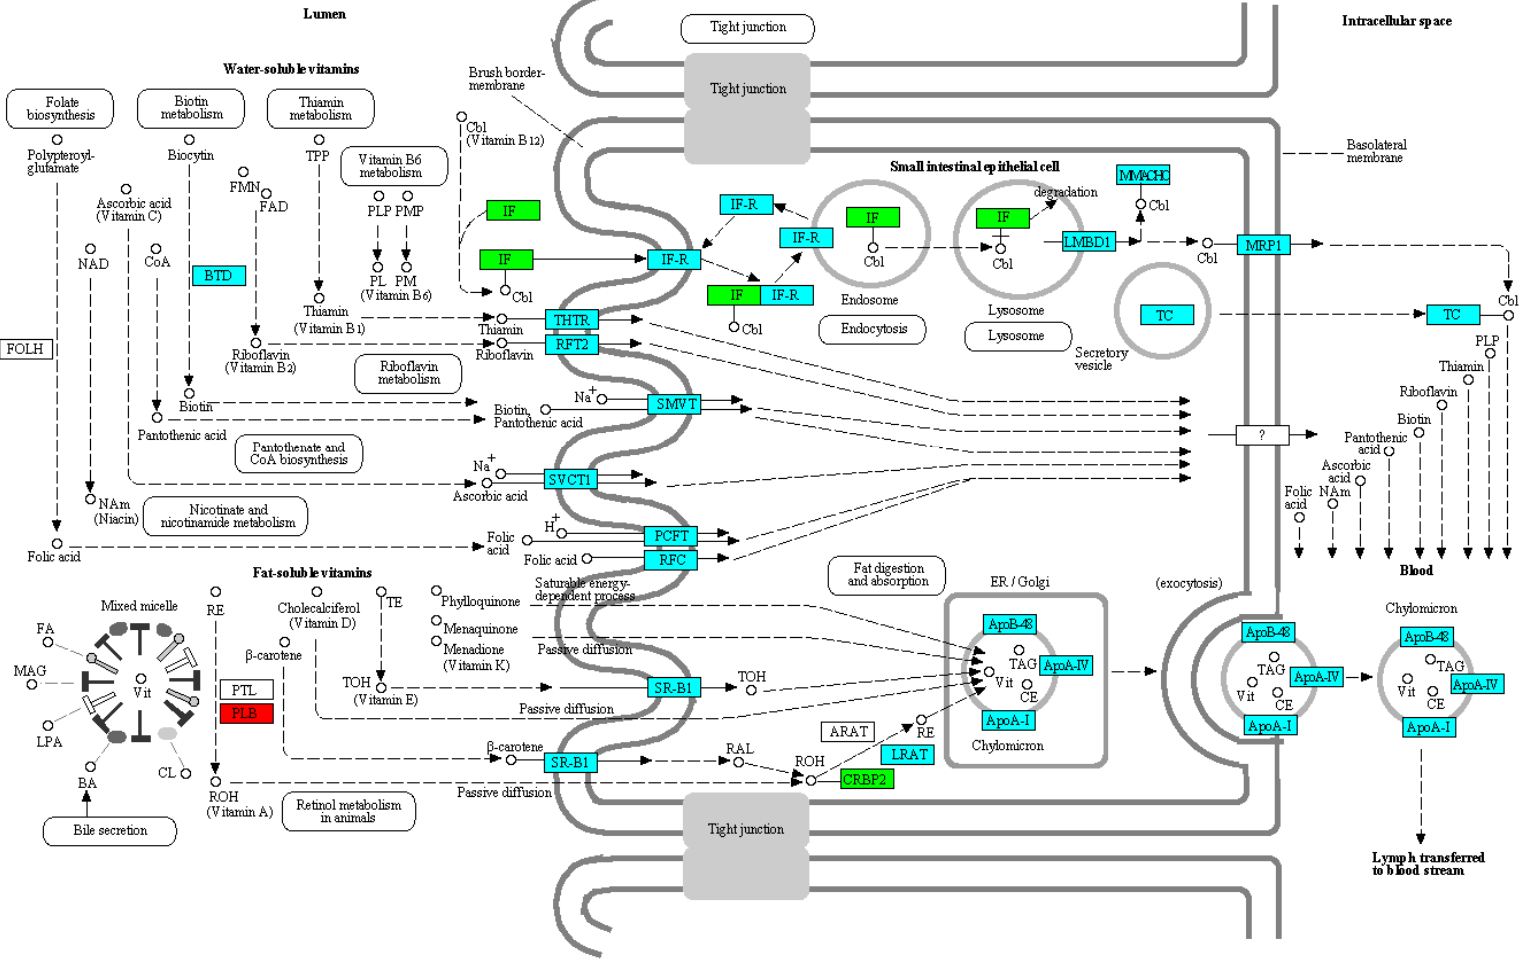

# α-LINOLENIC ACID METABOLISM

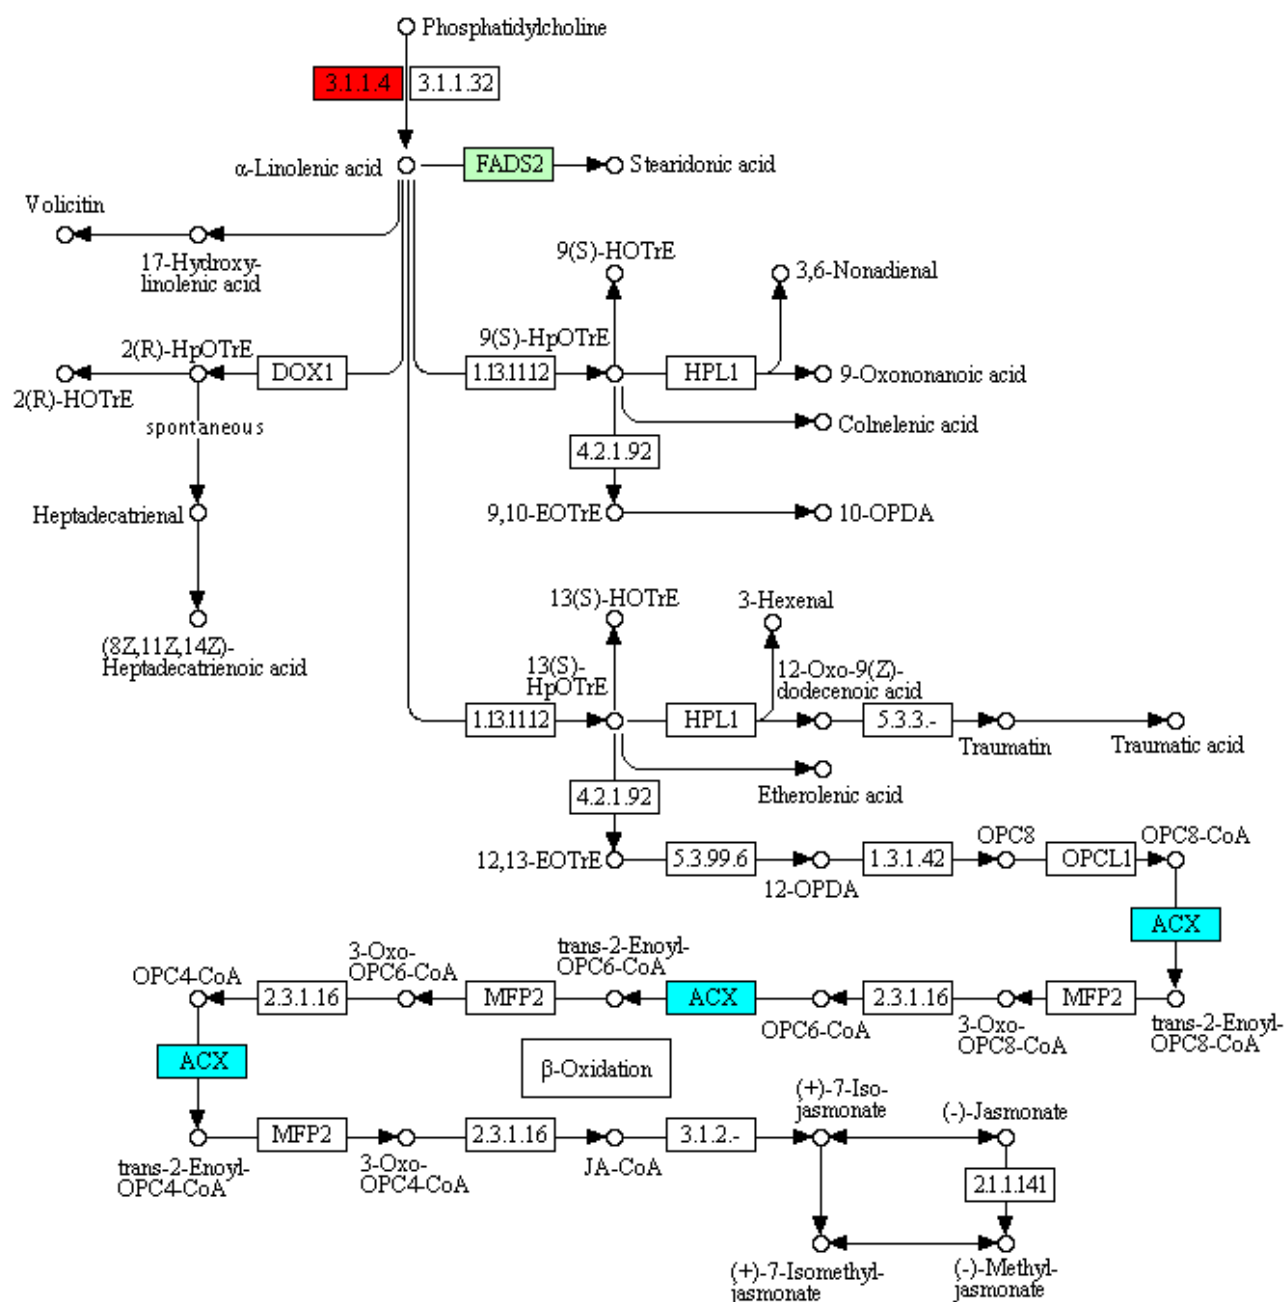

# FAT DIGESTION AND ABSORPTION

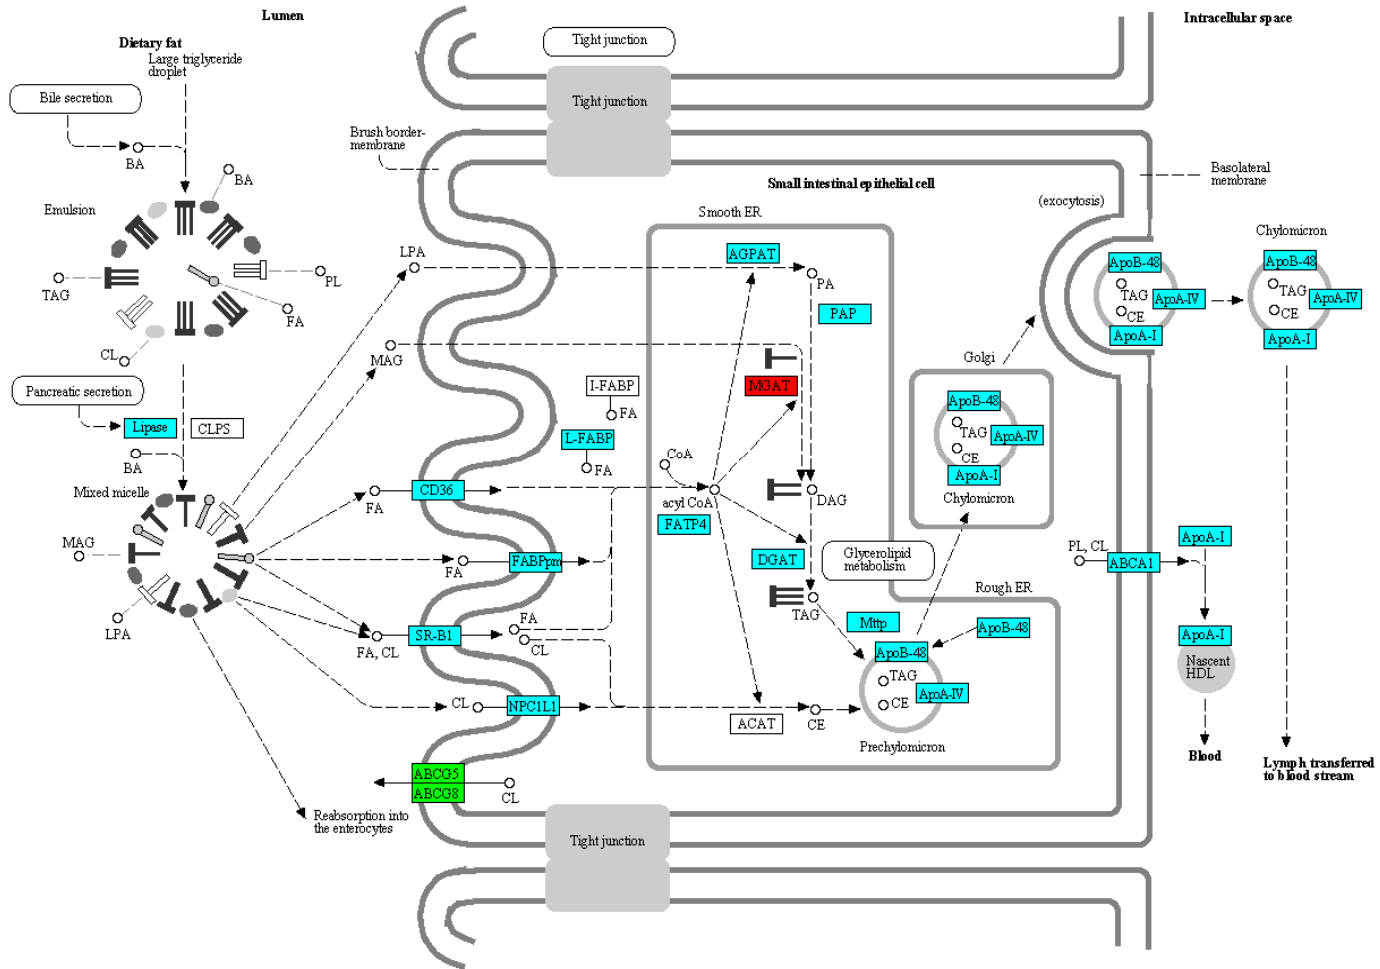

**NEUROACTIVE LIGAND-RECEPTOR INTERACTION**

**GPCRs**

**Class A Rhodopsin like Amine**

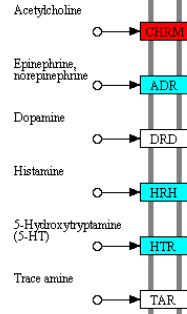

**Peptide**

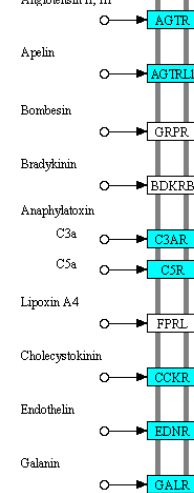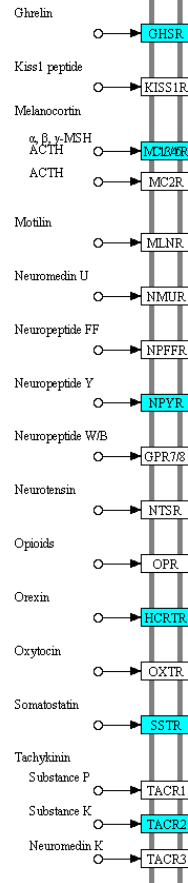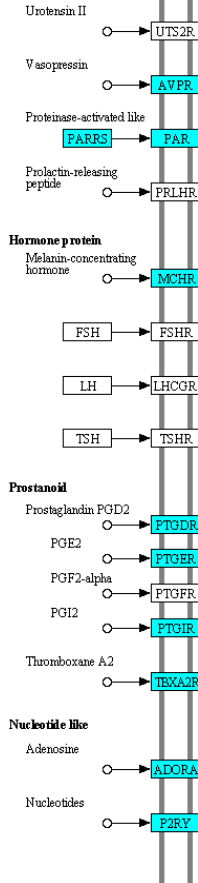

**Cannabinoid**

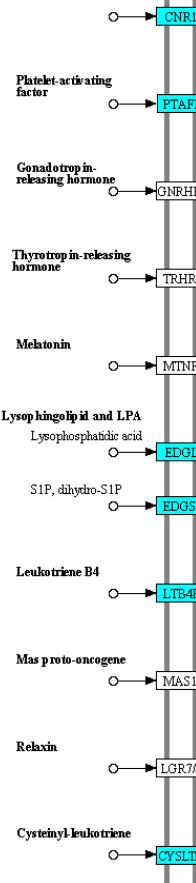

**Class B Secretin like**

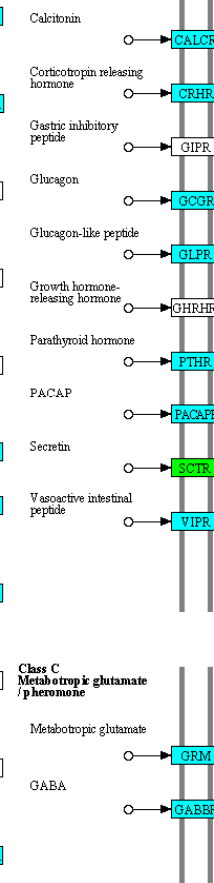

**Channels / other receptors**

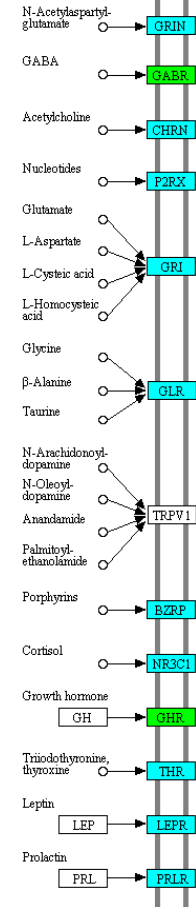

Supplement: 1471-2164-13-193-S5.pdf [file 1471-2164-13-193-S5.pdf]
